# Supplementary material for: Plasma Membrane-Associated Proteins Identified in Arabidopsis Wild Type, lbr2-2 and bak1-4 Mutants Treated with LPSs from Pseudomonas syringae and Xanthomonas campestris
Source: MDPI journal article supplement (doi:10.3390/membranes12060606), 2022-06-10
Supplement: s1 [file s1]

Supplementary materials

# Plasma Membrane-Associated Proteins Identified in Arabidopsis Wild Type, *lbr2-2* and *bak1-4* Mutants Treated with LPSs from *Pseudomonas syringae* and *Xanthomonas campestris*

Benedict C. Offor, Msizi I. Mhlongo, Ian A. Dubery and Lizelle A. Piater \*

Department of Biochemistry, University of Johannesburg, Auckland Park, Johannesburg 2006, South Africa; benedictoffor@gmail.com (B.C.O.); mmhlongo@uj.ac.za (M.I.M.); idubery@uj.ac.za (I.A.D.)

\* Correspondence: lpiater@uj.ac.za; Tel.: +27-11-559-2403

Relevant Figures and Tables referred to but not included in the main text are provided in this supplementary file. Restrictions apply to the availability of raw data. Data were obtained from CPGR, South Africa, and are available from the corresponding author (for data set identifier, username and password) for repository JPST001598/PXD034031. Repository citation: Okuda, S. et 521 al. jPOSTrepo: an international standard data repository for proteomes. Nucl. Acids Res. 45 (D1): 522 D1107-D1111 (2017). doi: 10.1093/nar/gkw1080.

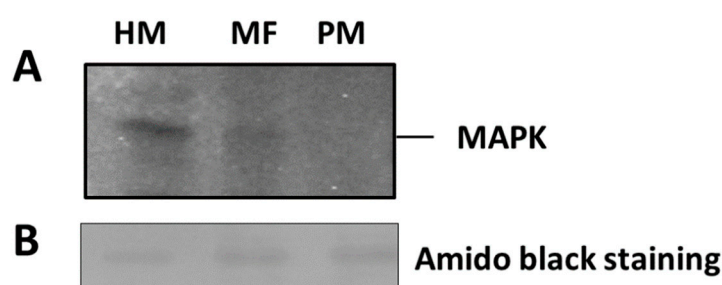

**Figure S1.** Representative characterisation of Arabidopsis PM fractions by Western blot analysis. **(A)** MAPK was probed with anti-active MAPK pAb, rabbit (pTEpY) antibody in the isolated Arabidopsis homogenate (HM), microsomal fraction (MF) and plasma membrane (PM-associated) subsequent to 12 h LPS from *Pst* treatment. **(B)** Amido Black PVDF nitrocellulose membrane-stained loading control indicates that lack of MAPK activity in PM fraction is not due to the absence or unequal loading of proteins.

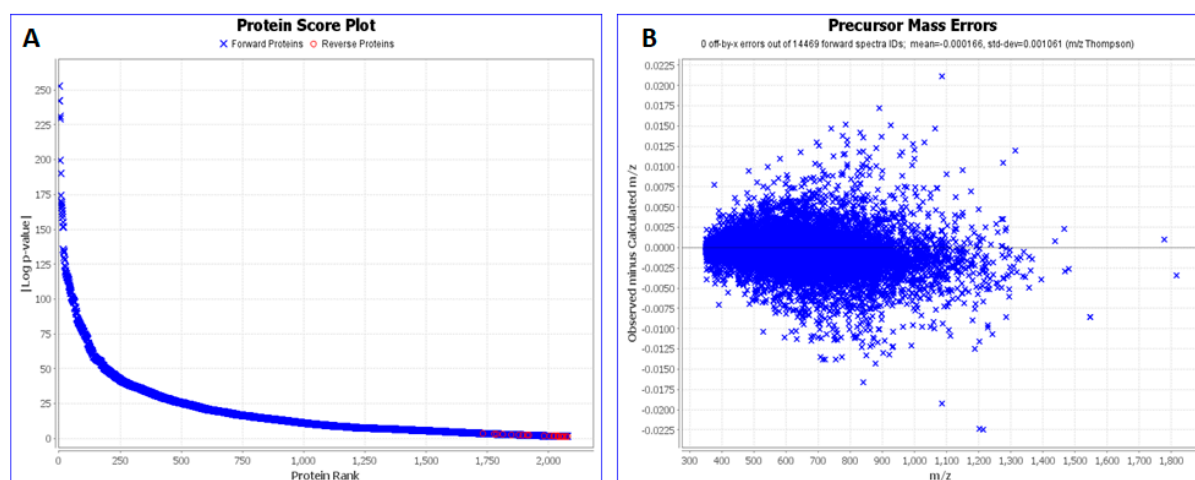

**Figure S2.** Summary of the Byonic™ software data analysis for Arabidopsis PM-associated protein identification. **(A)** A score plot representation of the differential abundance of proteins. **(B)** Representation of the precursor mass error loadings plot. This indicates the difference between the calculated mass and the observed mass of the peptides.

**Table S1.** LPS-responsive PM-associated proteins identified from the Arabidopsis WT, *lbr2-2* and *bak1-4* plants treated with LPS from *Pst* and *Xcc*. Proteins identified in the control (MgCl<sub>2</sub>-treated) were not selected as significant proteins. LPS<sub>*Pst*</sub> and LPS<sub>*Xcc*</sub>-responsive proteins were deemed significant over the treatment period (0, 12, 18 and 24 h) with a Byonic™ score ≥ 300 and log probability ≥ 1. Selected proteins with the functional categories such as membrane transport and trafficking, metabolic process, perception and signalling, and stress and defence response are coloured (only WT: Green; WT and *lbr2-2*: Pink; WT and *bak1-4*: Yellow; only mutants: Blue; all 3 lines: Grey and with a lighter shade for only 1 chemotype). The proteins indicated in bold are discussed in the main text.

| Protein ID                                       | Uniprot ID | Log prob | Byonic™ score | WT (h) |        | lbr2-2 (h) |     | bak1-4 (h) |           |
|--------------------------------------------------|------------|----------|---------------|--------|--------|------------|-----|------------|-----------|
|                                                  |            |          |               | Pst    | Xcc    | Pst        | Xcc | Pst        | Xcc       |
| Membrane Transport and Trafficking               |            |          |               |        |        |            |     |            |           |
| ABC transporter B family member 17               | Q9LSJ6     | 3.04     | 335.7         |        |        | 18         |     |            |           |
| ABC transporter B family member 20               | Q9M3B9     | 8.94     | 442.2         |        |        |            |     | 0, 18      |           |
| ABC transporter B family member 21               | Q9M1Q9     | 7.31     | 331.5         | 18     | 12, 18 |            |     |            |           |
| ABC transporter B family member 22               | Q9LSJ2     | 1.92     | 304.4         |        |        |            | 24  |            |           |
| ABC transporter B family member 29 chloroplastic | Q9LZB8     | 4.94     | 376.5         |        |        | 12, 18     |     |            |           |
| ABC transporter B family member 4                | O80725     | 7.88     | 333.3         | 24     | 12, 18 |            |     |            | 24        |
| ABC transporter B family member 6                | Q8LPT1     | 4.10     | 317.5         |        | 24     |            |     | 24         | 0, 12, 18 |
| ABC transporter C family member 4                | Q7DM58     | 5.92     | 340.4         |        |        |            |     | 0, 18      | 0, 18     |
| ABC transporter F family member 1                | Q9FJH6     | 6.89     | 451.0         |        |        |            |     |            | 0         |
| ABC transporter G family member 12               | Q9C8K2     | 4.85     | 344.3         |        |        | 12         |     |            |           |

|                                                          |        |       |       |               |               |               |            |               |
|----------------------------------------------------------|--------|-------|-------|---------------|---------------|---------------|------------|---------------|
| <b>ABC transporter G family member 32</b>                | O81016 | 6.53  | 336.4 | 12            | 12, 18        |               |            |               |
| Acyl-CoA-binding domain-containing protein 2             | Q9STP8 | 4.06  | 303.0 | 18, 24        |               | 12            | 0, 24      |               |
| Acyl-CoA-binding domain-containing protein 6             | P57752 | 4.63  | 327.2 | 18, 24        | 0, 18         |               |            |               |
| ADP/ATP carrier protein 3 mitochondrial                  | O49447 | 5.74  | 312.4 |               | 0             | 0             | 0, 18, 24  |               |
| ADP-ribosylation factor A1F                              | Q6ID97 | 8.03  | 521.9 | 0, 18, 24     | 0, 18, 24     |               |            |               |
| ALA-interacting subunit 1                                | Q9LTW0 | 4.05  | 315.7 | 0             |               | 12, 24        | 12, 18, 24 | 0, 12, 18, 24 |
| Amino acid permease 1                                    | Q42400 | 6.79  | 300.4 |               |               |               |            | 18            |
| Amino acid transporter AVT1C                             | F4IUW3 | 6.83  | 346.4 |               | 12            |               |            |               |
| Ammonium transporter 2                                   | Q9M6N7 | 4.94  | 368.8 |               |               |               |            | 12            |
| AP-2 complex subunit alpha-1                             | Q8LPL6 | 4.10  | 300.4 |               |               | 0             |            |               |
| AP-2 complex subunit alpha-2                             | Q8LPK4 | 4.10  | 300.4 |               |               | 0             | 0, 18, 24  | 0, 12         |
| <b>Aquaporin PIP1-1</b>                                  | P61837 | 12.94 | 701.0 |               |               |               | 0          | 0, 18         |
| <b>Aquaporin PIP1-3</b>                                  | Q08733 | 6.15  | 312.5 | 24            | 12, 18        | 0, 12, 24     | 18, 24     |               |
| <b>Aquaporin PIP2-3</b>                                  | P30302 | 6.84  | 363.2 | 12, 18        | 0, 18         |               | 18, 24     | 12, 18        |
| <b>Aquaporin TIP1-2</b>                                  | Q41963 | 14.91 | 808.9 |               |               |               |            | 0, 12, 18, 24 |
| AT2G33120 protein                                        | B9DH97 | 4.16  | 403.7 |               |               |               |            | 0, 18         |
| ATP synthase subunit beta-3 mitochondrial                | Q9C5A9 | 10.05 | 628.6 | 0, 12, 18, 24 | 0, 12, 18, 24 |               |            | 0             |
| Auxin efflux carrier component 4                         | Q8RWZ6 | 7.85  | 329.8 |               | 18            | 0             |            |               |
| Auxin efflux carrier component 7                         | Q940Y5 | 6.38  | 333.4 |               | 18            | 0, 12         |            | 0, 12, 18, 24 |
| Auxin transporter protein 1                              | Q96247 | 6.60  | 423.8 | 12, 18        | 12, 18        |               |            |               |
| Auxin transporter-like protein 1                         | Q9LFB2 | 8.76  | 452.9 |               |               | 0, 24         |            | 0, 18         |
| Bet1-like SNARE 1-1                                      | Q9M2J9 | 6.49  | 397.1 |               |               |               | 24         |               |
| Beta-adaptin-like protein                                | F4JNZ8 | 6.04  | 347.7 |               | 24            | 12            | 18         | 0             |
| Calcium-transporting ATPase 1 endoplasmic reticulum-type | P92939 | 8.22  | 432.8 |               |               | 0, 12, 18, 24 | 0, 18, 24  |               |
| Calcium-transporting ATPase 4 endoplasmic reticulum-type | Q9XES1 | 7.75  | 463.9 |               | 0, 12, 18     |               |            | 12            |
| Calcium-transporting ATPase 9 plasma membrane-type       | Q9LU41 | 5.85  | 340.8 |               |               |               | 24         | 0, 18, 24     |
| <b>Clathrin heavy chain 1</b>                            | Q0WJN6 | 5.75  | 360.3 | 12            | 18, 24        |               |            | 0, 12, 18, 24 |
| <b>Clathrin heavy chain 2</b>                            | Q0WLB5 | 8.94  | 560.5 |               |               |               |            | 12, 24        |
| Clathrin interactor EPSIN 2                              | Q67YI9 | 7.03  | 341.0 |               |               | 24            | 0, 24      |               |
| <b>Clathrin light chain 1</b>                            | Q9SKU1 | 6.34  | 391.3 |               |               | 0, 12, 24     | 0, 24      |               |
| <b>Clathrin light chain 2</b>                            | O04209 | 8.94  | 487.7 | 12            | 24            |               |            |               |
| Coatamer subunit beta-1                                  | Q9SV21 | 7.53  | 327.5 | 0, 24         | 0, 12, 18, 24 | 12            | 0, 24      |               |
| Coatamer subunit beta-2                                  | Q9SV20 | 8.26  | 473.5 |               |               |               |            | 0, 18, 24     |

|                                              |         |      |       |            |               |            |               |                  |
|----------------------------------------------|---------|------|-------|------------|---------------|------------|---------------|------------------|
| Coatomer subunit delta                       | Q93Y22  | 7.00 | 341.5 | 12         | 12, 18, 24    | 0, 12, 24  | 0             |                  |
| Coatomer subunit gamma                       | Q0WW26  | 6.48 | 363.3 | 0, 18, 24  | 0, 12, 18, 24 |            |               |                  |
| Coatomer subunit zeta-3                      | Q8H1F4  | 4.90 | 391.4 |            |               | 0, 12, 24  |               |                  |
| Dynamin-2A                                   | Q9SE83  | 6.58 | 516.5 |            |               | 24         | 0, 12, 18     |                  |
| Equilibrative nucleotide transporter 1       | Q8VXY7  | 6.87 | 311.2 | 0, 12      | 0, 18, 24     | 0, 12, 24  | 0             |                  |
| <b>Exocyst complex component EXO70A1</b>     | Q9LZD3  | 6.74 | 325.5 |            | 18            | 12         |               | 0                |
| <b>Exocyst complex component EXO70B1</b>     | Q9FGH9  | 8.16 | 409.2 |            |               |            | 12            | 0                |
| <b>Exocyst complex component SEC15B</b>      | F4JHH5  | 5.95 | 365.1 |            |               |            |               | 0                |
| <b>Exocyst complex component SEC3A</b>       | Q9SX85  | 7.01 | 312.7 |            |               |            | 0, 12         | 0, 12            |
| <b>Exocyst complex component SEC5A</b>       | Q8S3U9  | 6.31 | 429.3 |            |               | 0, 12      | 0             | 12, 18, 0, 12    |
| <b>Exocyst complex component SEC6</b>        | Q94AI6  | 6.34 | 344.0 | 12         | 12, 24        | 0, 12      | 0, 24         |                  |
| <b>Exocyst complex component SEC8</b>        | Q93YU5  | 4.60 | 323.3 |            |               | 0, 12      | 0             | 0, 12, 0, 12, 24 |
| <b>Flotillin-like protein 1</b>              | Q501E6  | 6.29 | 405.8 | 12, 18, 24 | 24            | 0, 12, 24  | 0, 18, 24     |                  |
| <b>Flotillin-like protein 2</b>              | Q4V3D6  | 6.10 | 363.8 | 0, 12, 24  | 24            |            |               |                  |
| Gamma-soluble NSF attachment protein         | Q9SPE5  | 7.60 | 418.2 | 12, 18, 24 | 0, 12, 24     | 0, 18      |               |                  |
| GTP-binding protein SAR1A                    | O04834  | 7.48 | 437.8 | 18         | 18            | 12, 18, 24 | 0             |                  |
| High-affinity nitrate transporter 3.1        | Q9FGS5  | 9.25 | 389.4 |            |               |            | 12            | 12               |
| Lysine histidine transporter 1               | Q9FKS8  | 4.53 | 300.8 |            |               |            | 0, 12         | 12, 18           |
| Mechanosensitive ion channel protein 10      | Q9LYG9  | 7.25 | 334.5 |            |               |            | 0             |                  |
| Membrane magnesium transporter               | Q2HIM5  | 3.72 | 318.7 |            |               | 0, 12      | 0             | 18, 0            |
| Mitochondrial pyruvate carrier 1             | Q949R9  | 6.84 | 473.7 |            |               |            | 18            | 0, 18            |
| Monosaccharide-sensing protein 2             | Q8LPQ8  | 8.63 | 410.6 |            | 12            |            | 0, 12, 18, 24 | 0, 12, 18, 24    |
| Novel plant SNARE 12                         | Q9LNH6  | 3.90 | 382.4 |            |               | 12         |               |                  |
| Novel plant SNARE 13                         | Q9LRP1  | 6.44 | 398.9 |            |               |            |               | 18               |
| Nucleobase-ascorbate transporter 3           | Q8GZD4  | 5.26 | 367.4 |            |               |            | 0, 12, 18, 24 | 0, 12, 18, 24    |
| Nucleobase-ascorbate transporter 7           | Q0WPPE9 | 7.22 | 358.0 |            | 12            |            |               |                  |
| Oligopeptide transporter 3                   | O23482  | 7.15 | 357.1 |            |               | 0, 12      | 18            |                  |
| Oxysterol-binding protein-related protein 3A | Q9LZM1  | 6.77 | 311.8 |            |               | 0          |               |                  |
| Patellin-2                                   | Q56ZI2  | 7.31 | 308.4 |            |               | 0, 12, 24  | 0, 18, 24     |                  |
| Patellin-3                                   | Q56Z59  | 6.30 | 373.3 | 0, 12, 24  | 0, 18, 24     | 0, 12, 24  | 0, 18         |                  |
| Patellin-4                                   | Q94C59  | 6.95 | 436.8 |            |               |            | 0, 18, 24     | 0, 18            |

|                                                                |        |      |       |        |        |               |               |               |
|----------------------------------------------------------------|--------|------|-------|--------|--------|---------------|---------------|---------------|
| Phosphatidylinositol/phosphatidylcholine transfer protein SFH5 | Q8GXC6 | 5.85 | 374.6 |        |        |               |               | 0             |
| Phospholipid-transporting ATPase 1                             | P98204 | 6.45 | 353.9 | 18     |        | 0, 24         | 0, 12, 18     | 0, 12, 18     |
| Phospholipid-transporting ATPase 3                             | Q9XIE6 | 6.33 | 391.9 |        |        |               | 0, 12, 18     | 0, 18, 24     |
| Plasma membrane intrinsic protein 1B                           | A8MRW1 | 8.58 | 488.7 |        |        | 0, 12, 18, 24 | 0, 12, 18, 24 |               |
| Potassium transporter 13                                       | Q8LPL8 | 8.54 | 515.8 | 12     | 12, 18 |               |               |               |
| Potassium transporter 4                                        | Q9LD18 | 6.52 | 372.3 |        |        |               | 0             | 0, 12         |
| Potassium transporter 8                                        | Q9M7J9 | 4.74 | 328.2 |        |        |               |               | 0             |
| <b>Probable aquaporin PIP1-4</b>                               | Q39196 | 6.18 | 330.7 |        |        | 0, 12, 24     | 0, 24         | 0, 12, 18, 24 |
| Probable clathrin assembly protein At4g32285                   | Q8S9J8 | 3.25 | 321.4 |        |        |               | 18            |               |
| Probable cyclic nucleotide-gated ion channel 6                 | O82226 | 6.39 | 336.6 |        |        |               | 12            |               |
| Probable phospholipid-transporting ATPase 11                   | Q9SAF5 | 3.98 | 316.3 |        |        | 12            | 24            |               |
| Probable purine permease 18                                    | Q9C508 | 9.36 | 462.8 |        |        |               | 12, 18        |               |
| Probable voltage-gated potassium channel subunit beta          | O23016 | 8.59 | 490.5 |        |        |               | 18            | 0             |
| Protein NRT1/ PTR FAMILY 6.3                                   | Q05085 | 9.07 | 434.2 |        |        |               | 18            |               |
| Protein NRT1/ PTR FAMILY 8.1                                   | Q9M390 | 8.18 | 537.8 |        |        | 0, 18         | 0, 12, 24     |               |
| Protein OSCA1                                                  | Q9XEA1 | 5.82 | 401.5 |        |        | 0             | 0             |               |
| Protein TPLATE                                                 | F4J8D3 | 6.54 | 352.0 |        |        |               | 0, 12         | 0, 12, 24     |
| <b>Protein transport protein Sec61 subunit beta</b>            | Q9FKK1 | 8.66 | 377.3 |        |        |               | 18            |               |
| Protein YIPF                                                   | Q93VH1 | 5.81 | 339.2 |        |        |               | 24            |               |
| Putative GTP-binding protein ara-3                             | Q9FJF1 | 8.91 | 592.2 |        |        |               | 12, 18        |               |
| Putative vesicle-associated membrane protein 726               | Q9MAS5 | 6.44 | 550.8 |        |        | 0             | 24            | 0             |
| Rac-like GTP-binding protein ARAC3                             | Q38912 | 5.68 | 335.9 | 0      |        | 12            |               | 0             |
| Rac-like GTP-binding protein ARAC4                             | Q38919 | 5.68 | 335.9 | 0, 24  | 24     | 12            |               |               |
| Rac-like GTP-binding protein ARAC5                             | Q38937 | 5.68 | 335.9 | 0, 24  |        | 12            |               |               |
| <b>Ras-related protein RABA1a</b>                              | P28185 | 7.04 | 494.7 |        | 18     |               |               |               |
| <b>Ras-related protein RABA1d</b>                              | Q9SN35 | 6.90 | 411.9 | 12, 24 | 12, 24 |               | 0, 12, 18     | 24            |
| <b>Ras-related protein RABA1f</b>                              | Q9FJH0 | 7.43 | 523.1 |        |        |               | 0, 12         | 18            |
| <b>Ras-related protein RABA1g</b>                              | Q9LK99 | 4.53 | 354.0 |        |        |               | 0, 18         | 12            |
| <b>Ras-related protein RABA2a</b>                              | O04486 | 7.23 | 302.3 | 24     | 18, 24 |               | 0             |               |
| <b>Ras-related protein RABA2b</b>                              | Q9LNW1 | 6.72 | 483.1 |        |        | 18            |               |               |

|                                                            |        |       |       |           |               |               |               |               |
|------------------------------------------------------------|--------|-------|-------|-----------|---------------|---------------|---------------|---------------|
| Ras-related protein RABA2c                                 | Q96283 | 6.96  | 468.7 |           |               | 0, 12, 24     | 18, 24        |               |
| Ras-related protein RABA2d                                 | Q9FIF9 | 6.96  | 468.7 |           |               | 18            | 12            |               |
| Ras-related protein RABA4a                                 | Q9FJN8 | 6.33  | 417.9 |           |               |               |               | 0, 12, 18, 24 |
| Ras-related protein RABA4b                                 | Q9SMQ6 | 7.09  | 310.4 | 24        | 0             | 0, 12, 18     | 0             |               |
| Ras-related protein RABA5a                                 | Q9FGK5 | 4.09  | 400.1 |           |               | 0             |               |               |
| Ras-related protein RABA5b                                 | Q9SRS5 | 4.11  | 317.8 |           |               | 0             |               |               |
| Ras-related protein RABA5c                                 | P28187 | 4.11  | 317.8 |           |               | 0             |               |               |
| Ras-related protein RABB1c                                 | P92963 | 8.23  | 475.2 |           |               | 0, 12, 18, 24 | 0, 12, 18, 24 |               |
| Ras-related protein RABC1                                  | O23657 | 6.32  | 357.1 | 0, 18, 24 | 12, 24        | 24            | 18, 24        |               |
| Ras-related protein RABD1                                  | Q9ZRE2 | 12.33 | 668.8 |           |               |               |               | 18            |
| Ras-related protein RABD2a                                 | P28188 | 8.01  | 437.1 | 0, 12, 24 | 18, 24        |               |               | 0             |
| Ras-related protein RABD2b                                 | Q9FPJ4 | 8.73  | 526.1 |           |               | 12, 18, 24    | 0, 18, 24     |               |
| Ras-related protein RABD2c                                 | Q9SEH3 | 9.11  | 574.2 | 12        | 0             |               |               | 0, 12, 18     |
| Ras-related protein RABE1a                                 | O24466 | 5.23  | 309.6 | 0, 24     | 18, 24        | 12, 24        | 0, 12, 24     | 0             |
| Ras-related protein RABE1c                                 | P28186 | 6.24  | 349.8 |           |               | 18            | 12            |               |
| Ras-related protein RABE1d                                 | Q9LZD4 | 8.17  | 456.5 |           |               | 0, 12, 24     | 0, 18, 24     | 12            |
| Ras-related protein RABF1                                  | Q9CB01 | 8.20  | 498.3 |           |               |               |               | 0, 18         |
| Ras-related protein RABF2b                                 | Q9SN68 | 6.75  | 341.8 | 24        | 0, 12, 18, 24 |               |               | 0, 18         |
| Ras-related protein RABG1                                  | Q948K6 | 6.38  | 415.5 | 24        | 0, 12, 18, 24 | 12, 18, 24    | 0, 12, 18, 24 |               |
| Ras-related protein RABG3b                                 | O04157 | 7.06  | 340.6 | 0, 12, 24 | 12, 24        |               | 0, 18         |               |
| Ras-related protein RABG3e                                 | Q9XI98 | 6.39  | 312.0 | 12, 24    | 18            | 0, 12, 24     | 0, 12         |               |
| Root phototropism protein 3                                | Q9FMF5 | 5.92  | 377.8 |           |               |               |               | 0             |
| S-adenosylmethionine carrier 1 chloroplastic/mitochondrial | Q94AG6 | 7.43  | 334.8 | 12        | 0, 18, 24     | 0, 12, 24     | 0, 18         |               |
| SEC6                                                       | F4IA34 | 8.33  | 440.8 |           |               |               |               | 0             |
| Secretory carrier-associated membrane protein              | F4HTI7 | 7.46  | 434.6 | 0, 18, 24 | 0, 12, 18     |               |               |               |
| SecY protein transport family protein                      | Q8RWJ5 | 10.58 | 612.0 |           |               |               |               | 0, 12, 18, 24 |
| Sodium/hydrogen exchanger 1                                | Q68KI4 | 8.34  | 473.9 |           |               |               |               | 0, 12, 18     |
| Sorting nexin 1                                            | Q9FG38 | 2.08  | 332.1 |           |               |               |               | 18, 24        |
| Sucrose transport protein SUC1                             | Q39232 | 4.93  | 309.8 | 12        |               |               |               |               |
| Sucrose transport protein SUC1                             | Q39232 | 5.02  | 316.4 |           |               | 12            |               |               |
| Sugar transport protein 4                                  | Q39228 | 4.70  | 354.4 |           |               |               |               | 12            |
| Syntaxin-122                                               | Q9SVC2 | 6.59  | 377.1 |           |               |               |               | 0, 12, 18, 24 |
| Thylakoid ADPATP carrier protein chloroplastic             | Q9M024 | 6.79  | 456.7 |           |               |               |               | 0, 12, 18, 24 |
| TOM1-like protein 1                                        | Q9LFL3 | 4.24  | 300.4 | 12, 18    |               |               |               |               |
| Transducin/WD40 repeat-like superfamily protein            | F4JN30 | 1.90  | 309.2 | 0         |               |               |               | 0             |

|                                                                |        |       |       |        |           |               |           |               |               |
|----------------------------------------------------------------|--------|-------|-------|--------|-----------|---------------|-----------|---------------|---------------|
| Vacuolar protein sorting-associated protein 32 homolog 1       | O82197 | 3.55  | 317.3 |        |           |               |           | 24            |               |
| Vacuolar protein sorting-associated protein 32 homolog 2       | Q9SZE4 | 3.55  | 317.3 |        |           |               |           | 24            |               |
| Vacuolar sorting protein 39                                    | Q8L5Y0 | 7.56  | 427.3 |        |           |               |           |               | 0             |
| Vacuolar-sorting receptor 1                                    | P93026 | 6.11  | 340.3 |        |           | 12            |           |               |               |
| VAMP-like protein YKT61                                        | Q9ZRD6 | 4.22  | 337.1 |        | 0         | 0, 18         | 0, 18, 24 |               |               |
| Vesicle transport v-SNARE 12                                   | Q9SEL5 | 3.41  | 303.6 |        |           | 12            |           |               |               |
| Vesicle-associated membrane protein 721                        | Q9ZTW3 | 7.26  | 581.1 | 18     |           |               |           |               | 18            |
| Vesicle-associated membrane protein 722                        | P47192 | 4.16  | 403.7 |        |           |               |           | 0, 18, 24     | 0             |
| Vesicle-associated membrane protein 725                        | O48850 | 6.44  | 550.8 |        |           | 0             |           | 24            | 0             |
| Vesicle-associated protein 1-3                                 | Q84WW5 | 7.96  | 360.0 | 12     | 18        | 12, 24        |           |               |               |
| Vesicle-associated protein 2-1                                 | Q9LVU1 | 6.85  | 361.6 | 12     |           |               |           | 18            | 12            |
| Vesicle-associated protein 2-2                                 | B9DHD7 | 6.29  | 393.4 |        |           | 0, 12, 18, 24 | 0, 18, 24 | 0, 12, 18     | 0, 18         |
| Vesicle-fusing ATPase                                          | Q9M0Y8 | 4.46  | 305.0 |        | 18        | 0, 12         | 0         | 0, 24         | 0, 18         |
| V-type proton ATPase subunit F                                 | Q9ZQX4 | 5.94  | 417.1 |        |           |               |           | 0, 18         |               |
| V-type proton ATPase subunit G1                                | O82628 | 17.38 | 906.6 |        |           |               |           | 0, 12, 18     | 0, 12, 18, 24 |
| <b>Metabolic Process</b>                                       |        |       |       |        |           |               |           |               |               |
| 1-acyl-sn-glycerol-3-phosphate acyltransferase 1 chloroplastic | Q8GXU8 | 7.04  | 513.9 | 18     | 0, 12, 18 |               |           |               |               |
| 1-aminocyclopropane-1-carboxylate oxidase 2                    | Q41931 | 7.59  | 315.7 |        | 0         |               |           |               |               |
| 26S proteasome non-ATPase regulatory subunit 1 homolog B       | Q9MAT0 | 7.03  | 366.4 |        | 18        |               |           |               |               |
| 26S proteasome non-ATPase regulatory subunit 2 homolog A       | Q9SIV2 | 7.58  | 387.3 | 0, 24  | 0, 24     |               | 0, 12     | 0, 12, 18, 24 | 0, 12, 18     |
| 26S proteasome non-ATPase regulatory subunit 3 homolog A       | Q9LNU4 | 4.76  | 310.9 |        |           | 12, 24        | 12, 24    |               |               |
| 26S proteasome non-ATPase regulatory subunit 3 homolog B       | Q9LQR8 | 4.57  | 331.8 | 18     | 0, 18     | 0, 24         |           |               | 18            |
| 26S proteasome non-ATPase regulatory subunit 4 homolog         | P55034 | 7.12  | 329.0 |        | 0         |               | 0, 18     |               |               |
| 26S proteasome non-ATPase regulatory subunit 6 homolog         | Q93Y35 | 5.67  | 307.2 | 12, 24 |           |               |           |               |               |
| 26S proteasome non-ATPase regulatory subunit 7 homolog A       | O24412 | 6.74  | 327.9 |        |           | 12            | 0, 24     |               |               |



|                                                                         |        |       |       |               |           |           |               |               |           |
|-------------------------------------------------------------------------|--------|-------|-------|---------------|-----------|-----------|---------------|---------------|-----------|
| 26S proteasome regulatory subunit 7 homolog A                           | Q9SSB5 | 4.99  | 370.7 | 12            | 0, 18     |           |               |               |           |
| 26S proteasome regulatory subunit 8 homolog A                           | Q9C5U3 | 6.54  | 303.1 | 0, 18, 24     | 0, 18, 24 |           |               |               |           |
| 26S proteasome regulatory subunit S10B homolog B                        | Q9MAK9 | 5.56  | 316.5 |               |           | 0, 12     |               | 0, 12, 18, 24 | 0, 12, 18 |
| 3-oxo-5-alpha-steroid 4-dehydrogenase (DUF1295)                         | F4HRY1 | 5.98  | 382.6 |               |           | 0, 12, 18 | 0, 12, 18     |               |           |
| 5-methyltetrahydropteroyltriglutamate--homocysteine methyltransferase 2 | Q9SRV5 | 8.53  | 441.7 | 12, 18        | 0, 12, 18 | 12, 24    | 0             |               |           |
| 5'-methylthioadenosine/S-adenosylhomocysteine nucleosidase 1            | Q9T0I8 | 5.73  | 304.5 |               | 24        |           |               |               |           |
| 7-dehydrocholesterol reductase                                          | Q9LDU6 | 6.37  | 358.5 |               |           | 12        |               |               |           |
| Acetyl-CoA acetyltransferase cytosolic 1                                | Q8S4Y1 | 8.16  | 446.2 |               |           | 0, 12, 24 | 0, 18, 24     |               |           |
| Acetyl-CoA carboxylase 1                                                | Q38970 | 6.15  | 335.3 |               |           |           |               |               | 0         |
| Acyl-CoA-binding domain-containing protein 1                            | Q9SM23 | 3.97  | 307.0 | 12            | 18        |           |               |               |           |
| Adenine nucleotide alpha hydrolases-like superfamily protein            | Q94II5 | 7.18  | 386.2 | 12            | 24        | 0, 12, 24 | 0, 12         | 18            |           |
| Adenine phosphoribosyl transferase 1                                    | F4HSX1 | 8.26  | 519.5 |               |           |           |               |               | 18        |
| Adenylylsulfatase HINT1                                                 | Q8GUN2 | 7.37  | 391.6 |               |           | 0         | 24            |               |           |
| ADP-ribosylation factor GTPase-activating protein AGD12                 | Q9FVJ3 | 7.13  | 321.4 | 18            | 24        | 12        | 0             |               |           |
| Alanine--glyoxylate aminotransferase 2 homolog 1 mitochondrial          | Q940M2 | 8.74  | 381.8 |               |           | 12        | 0             |               |           |
| Allene oxide cyclase 3 chloroplastic                                    | Q9LS01 | 7.75  | 399.5 |               |           |           |               | 12            | 24        |
| Alpha/beta-Hydrolases superfamily protein                               | Q8VZV6 | 6.40  | 307.5 |               |           |           |               | 0, 18         | 18        |
| Aminopeptidase M1                                                       | Q8VZH2 | 6.15  | 310.8 |               | 24        |           |               |               |           |
| Aspartate aminotransferase 3 chloroplastic                              | P46644 | 5.73  | 376.9 |               |           | 0, 12, 18 | 0, 12, 18, 24 |               | 18        |
| Aspartate aminotransferase cytoplasmic isozyme 1                        | P46645 | 5.34  | 302.1 | 0, 12, 18, 24 | 0         |           |               |               |           |
| Aspartate--tRNA ligase 2 cytoplasmic                                    | Q9M084 | 10.73 | 605.9 |               |           |           |               | 0, 12, 18, 24 | 0, 12, 18 |
| At1g29790                                                               | Q8RWB7 | 6.92  | 324.2 | 0             | 0, 12, 18 | 18, 24    | 0, 12, 24     |               |           |
| At4g29870                                                               | Q9SZQ8 | 7.35  | 342.3 | 0, 18         | 12, 24    |           |               |               | 0, 12     |
| At4g33120                                                               | Q84TE2 | 4.04  | 305.5 | 0, 18, 24     |           |           |               |               |           |
| AT4g35220/F23E12_220                                                    | Q94JT5 | 4.32  | 353.8 | 12, 18, 24    |           |           |               |               |           |



|                                                                                              |        |      |       |               |               |               |           |                          |
|----------------------------------------------------------------------------------------------|--------|------|-------|---------------|---------------|---------------|-----------|--------------------------|
| AT5g10730/MAJ23_90                                                                           | Q93VH5 | 8.77 | 411.5 | 0, 12, 18     | 0, 18, 24     | 12, 24        | 0, 24     |                          |
| At5g19440                                                                                    | Q29Q34 | 4.18 | 315.0 |               |               | 24            |           |                          |
| ATP sulfurylase 1 chloroplastic                                                              | Q9LIK9 | 6.29 | 388.4 |               |               | 0, 12, 24     | 0, 18, 24 | 18, 12, 24               |
| ATP-citrate synthase beta chain protein 2                                                    | Q9FGX1 | 5.85 | 348.1 |               |               |               |           | 18                       |
| ATP-dependent helicase/deoxyribonuclease subunit B                                           | Q8L776 | 7.25 | 316.9 |               |               | 0             |           | 0, 12, 24, 0, 12, 24     |
| BTB/POZ domain-containing protein At1g30440                                                  | Q9S9Q9 | 7.24 | 367.7 |               | 18            |               | 18        |                          |
| Caffeoyl-CoA O-methyltransferase 1                                                           | O49499 | 3.65 | 301.2 |               |               | 12            |           |                          |
| Caffeoylshikimate esterase                                                                   | Q9C942 | 7.43 | 327.5 | 24            |               |               |           | 18                       |
| Calcium-dependent lipid-binding (CaLB domain) plant phosphoribosyltransferase family protein | Q9C8H3 | 6.52 | 355.7 | 12, 18        | 0, 18, 24     |               |           | 0, 12, 18, 24, 0, 12, 18 |
| Cell division control protein 48 homolog D                                                   | Q9SCN8 | 9.01 | 495.4 |               |               |               |           | 12                       |
| Cell division control protein 48 homolog E                                                   | Q9LZF6 | 9.01 | 495.4 |               |               |               |           | 12                       |
| Cinnamyl alcohol dehydrogenase 7                                                             | Q02971 | 3.48 | 407.7 |               |               | 0, 12, 18, 24 | 0, 18, 24 | 0, 12, 18, 0, 18, 24     |
| Cullin-associated NEDD8-dissociated protein 1                                                | Q8L5Y6 | 6.23 | 422.6 |               |               |               |           | 12, 0                    |
| Cyclin-dependent kinase A-1                                                                  | P24100 | 6.43 | 329.7 |               |               |               |           | 0, 0                     |
| Cytochrome P450 71B11                                                                        | P58049 | 4.36 | 329.2 |               | 0             |               |           |                          |
| Cytochrome P450 71B6                                                                         | O65787 | 6.35 | 371.3 |               |               | 0, 12, 18, 24 | 0, 12     |                          |
| D-lactate dehydrogenase [cytochrome] mitochondrial                                           | Q94AX4 | 7.09 | 430.2 | 0, 12, 24     | 0, 12, 24     |               |           | 0, 12, 18, 0, 12, 18     |
| E3 ubiquitin-protein ligase RNF170-like protein (DUF 1232)                                   | F4I1E4 | 6.59 | 346.2 |               |               |               |           | 0, 12, 18, 0, 12, 18, 24 |
| E3 ubiquitin-protein ligase UPL3                                                             | Q6WWW4 | 7.68 | 431.6 |               |               |               |           | 12, 0, 12                |
| Early nodulin-like protein 2                                                                 | Q9T076 | 5.59 | 323.0 | 0, 12, 18, 24 | 0, 12, 18, 24 |               |           |                          |
| Eukaryotic aspartyl protease family protein                                                  | Q9ZVS4 | 6.25 | 370.3 |               |               |               |           | 18                       |
| Expressed protein                                                                            | O48783 | 6.69 | 357.0 |               |               |               |           | 0                        |
| Expressed protein OS                                                                         | O48783 | 5.30 | 333.4 | 12, 18        |               |               |           |                          |
| F9K20.7 protein                                                                              | Q9ZVA7 | 6.76 | 324.6 |               |               | 12            |           |                          |
| Fasciclin-like arabinogalactan protein 1                                                     | Q9FM65 | 7.62 | 316.2 | 0, 12, 18, 24 | 0, 12, 18     | 0, 24         | 0         | 18, 18                   |
| Flavodoxin-like quinone reductase 1                                                          | F4K0D0 | 6.63 | 365.1 |               | 24            |               |           |                          |

|                                                                   |        |      |       |            |           |               |               |               |
|-------------------------------------------------------------------|--------|------|-------|------------|-----------|---------------|---------------|---------------|
| <b>Flavone 3'-O-methyltransferase 1</b>                           | Q9FK25 | 7.25 | 366.3 |            |           | 12            |               |               |
| Gamma-glutamyl peptidase 1                                        | Q9M0A7 | 1.74 | 310.6 | 12         | 18        |               |               |               |
| General regulatory factor 9                                       | F4IP55 | 6.86 | 457.4 |            |           |               | 18            | 0, 18         |
| Glucan endo-13-beta-glucosidase 5                                 | Q9M088 | 6.14 | 316.3 | 0          |           | 0             |               |               |
| Glutamate dehydrogenase 2                                         | Q38946 | 5.73 | 327.0 |            |           | 0, 12, 24     | 24            | 0, 18         |
| Glycerol-3-phosphate acyltransferase 9                            | Q8GWG0 | 6.16 | 366.9 |            |           | 0, 12, 24     | 0             | 0, 12         |
| Glycerophosphodiester phosphodiesterase GDPDL3                    | Q9SZ11 | 8.70 | 512.5 |            |           | 0, 12, 18, 24 | 0, 18, 24     | 0, 12, 18, 24 |
| Glycerophosphodiester phosphodiesterase GDPDL4                    | Q9FJ62 | 7.23 | 304.5 |            |           | 0             | 24            |               |
| Heavy metal-associated isoprenylated plant protein 26             | Q9SZN7 | 4.98 | 332.6 |            |           |               |               | 0, 12         |
| IAA-amino acid hydrolase ILR1-like 4                              | O04373 | 9.08 | 461.4 |            |           |               |               | 18            |
| Inositol-phosphate phosphatase                                    | Q9M8S8 | 2.87 | 301.5 | 24         | 18, 24    | 24            |               |               |
| Isocitrate dehydrogenase [NAD] regulatory subunit 1 mitochondrial | Q8LFC0 | 8.72 | 523.8 |            |           | 0, 12, 24     | 0, 12         |               |
| Lactoylglutathione lyase GLX1                                     | O65398 | 6.25 | 320.4 | 0, 24      | 12, 24    | 0, 12         | 0, 24         |               |
| LL-diaminopimelate aminotransferase chloroplastic                 | Q93ZN9 | 4.98 | 364.0 |            |           |               |               | 18            |
| Long chain acyl-CoA synthetase 4                                  | Q9T0A0 | 5.68 | 311.5 | 12, 18, 24 | 18        |               |               |               |
| Lysophospholipid acyltransferase 1                                | F4IDU4 | 6.60 | 318.0 | 24         | 0, 18, 24 | 12, 24        | 0, 12, 18, 24 |               |
| Methylcrotonoyl-CoA carboxylase beta chain mitochondrial          | Q9LDD8 | 6.13 | 330.8 |            |           | 12            | 0             | 0, 18         |
| Monodehydroascorbate reductase 2                                  | Q93WJ8 | 7.50 | 315.9 |            |           | 12            | 0             |               |
| Monogalactosyldiacylglycerol synthase 1 chloroplastic             | O81770 | 6.74 | 337.6 | 12         |           |               |               |               |
| N-acylphosphatidylethanolamine synthase                           | Q9ZV87 | 6.37 | 311.4 |            |           | 0             |               |               |
| NAD(P)-binding Rossmann-fold superfamily protein                  | Q9SZB3 | 8.36 | 506.9 | 24         | 0, 18, 24 |               |               | 0, 12, 18, 24 |
| NADH-ubiquinone oxidoreductase chain 1 (Fragment)                 | Q1ZXW0 | 3.74 | 319.8 | 12         |           |               |               | 0, 12, 18, 24 |
| Nitrate reductase [NADH] 2                                        | P11035 | 6.27 | 373.9 | 0, 12      | 0, 18, 24 | 0             |               |               |
| Nitrilase 3                                                       | P46010 | 9.24 | 444.7 |            | 18        |               |               |               |
| Pectin acetyltransferase 11                                       | Q9FH82 | 6.67 | 364.2 | 12         |           |               |               | 0, 12         |
| Peptidase M1 family protein                                       | F4I3R1 | 7.58 | 346.3 |            |           | 12            |               |               |

|                                                                    |        |       |       |            |               |       |    |               |            |
|--------------------------------------------------------------------|--------|-------|-------|------------|---------------|-------|----|---------------|------------|
| Peptidyl-prolyl cis-trans isomerase CYP18-4                        | Q42406 | 8.83  | 519.8 |            |               |       |    | 18            | 18         |
| Peptidyl-prolyl cis-trans isomerase CYP19-2                        | Q9SKQ0 | 7.90  | 367.7 |            | 12            |       | 18 |               |            |
| Peptidyl-prolyl cis-trans isomerase CYP21-2                        | Q8L8W5 | 4.32  | 322.4 |            |               |       | 0  |               |            |
| Peptidyl-prolyl cis-trans isomerase CYP21-4                        | Q9C835 | 7.46  | 358.1 | 12, 18, 24 | 0, 12, 18, 24 |       |    |               |            |
| Peptidyl-prolyl cis-trans isomerase FKBP42                         | Q9LDC0 | 6.93  | 314.0 |            |               |       |    |               | 0          |
| Peroxisomal fatty acid beta-oxidation multifunctional protein AIM1 | Q9ZPI6 | 4.50  | 324.4 | 0, 12      | 18, 24        | 0     |    |               |            |
| Phosphoglucosyltransferase/phosphomannomutase family protein       | F4I6W4 | 7.70  | 390.3 |            |               |       |    | 0, 12, 18, 24 | 0, 18, 24  |
| Phosphoglycerate mutase-like family protein                        | F4J8C7 | 4.61  | 333.3 |            |               |       |    | 0             | 0, 18      |
| Phosphoinositide phosphatase SAC7                                  | Q9C5G5 | 6.45  | 332.4 | 0, 12, 24  | 18, 24        |       |    |               |            |
| Phosphoinositide phospholipase C 7                                 | Q9LY51 | 3.35  | 307.0 |            |               |       |    | 18            |            |
| Phospholipase D gamma 2                                            | Q9T051 | 7.00  | 439.7 |            |               |       |    | 0             |            |
| Phospholipase D gamma 3                                            | Q9T052 | 8.21  | 422.8 |            |               |       |    |               | 0          |
| Phospholipid scramblase                                            | Q9SI32 | 1.51  | 329.3 |            | 18, 24        | 12    | 12 | 0, 12, 18     | 0, 18      |
| Photosystem II reaction center Psb28 protein                       | F4JM05 | 6.31  | 343.0 |            |               |       | 18 |               | 24         |
| Phytochrome-associated protein phosphatase type 2C                 | F4I1B4 | 7.35  | 516.8 |            |               | 12    |    |               |            |
| PLAC8 family protein                                               | Q8W4N1 | 4.32  | 325.9 |            |               |       |    | 0, 12         | 0, 24      |
| PLAT domain-containing protein 1                                   | O65660 | 3.34  | 319.8 |            |               |       |    | 12, 18        |            |
| Polyubiquitin 3                                                    | Q1EC66 | 10.65 | 611.6 | 24         |               | 0     | 12 |               |            |
| Porphobilinogen deaminase chloroplastic                            | Q43316 | 6.88  | 415.6 |            |               |       |    | 18            | 18         |
| Probable cyclic nucleotide-gated ion channel 3                     | Q9SKD7 | 4.46  | 309.2 |            |               |       |    | 12            | 0, 12      |
| Probable cytosolic oligopeptidase A                                | Q949P2 | 2.68  | 378.5 |            |               |       |    |               | 18         |
| Probable fructokinase-1                                            | Q9SID0 | 7.20  | 309.4 |            | 24            | 24    | 0  |               |            |
| Probable glutathione peroxidase 5                                  | Q9LYB4 | 4.84  | 405.6 |            |               |       |    | 12, 18        | 12, 18, 24 |
| Probable NAD(P)H dehydrogenase (quinone) FQR1-like 3               | Q9LUX9 | 5.95  | 307.6 | 12         |               | 0, 12 | 0  |               |            |
| Probable protein phosphatase 2C 58                                 | Q93YW5 | 4.81  | 361.6 |            |               |       |    | 18, 24        | 24         |
| Probable protein S-acyltransferase 13                              | Q94C49 | 9.24  | 528.8 |            |               |       |    | 0, 12         | 0, 18      |

|                                                                                       |        |      |       |               |               |           |       |               |               |
|---------------------------------------------------------------------------------------|--------|------|-------|---------------|---------------|-----------|-------|---------------|---------------|
| Probable sucrose-phosphate synthase 2                                                 | Q9FY54 | 6.07 | 352.5 |               |               | 0         | 0     |               |               |
| <b>Proteasome subunit alpha type-1-A</b>                                              | P34066 | 6.97 | 358.0 |               | 0, 24         | 0, 12, 24 | 0, 24 | 18            | 24            |
| <b>Proteasome subunit alpha type-1-B</b>                                              | O23712 | 7.67 | 469.0 |               |               |           |       |               | 24            |
| <b>Proteasome subunit alpha type-5-A</b>                                              | O81149 | 8.75 | 465.3 | 24            |               |           |       | 18            |               |
| <b>Proteasome subunit beta type</b>                                                   | F4JRY2 | 7.36 | 329.2 | 18, 24        |               | 12        |       | 18            |               |
| <b>Proteasome subunit beta type-2-A</b>                                               | O23714 | 8.47 | 473.0 |               |               |           |       | 18            |               |
| Protein CELLUL                                                                        | F4IIM1 | 6.53 | 382.1 |               |               | 12        |       |               | 0             |
| Protein disulfide isomerase-like 1-2                                                  | Q9SRG3 | 9.18 | 481.8 |               |               |           |       | 0, 12, 18     | 0, 12, 18, 24 |
| Protein disulfide-isomerase 2-3                                                       | O48773 | 6.51 | 381.4 |               |               |           |       | 0, 12, 18, 24 | 0, 12, 18, 24 |
| Protein DJ-1 homolog A                                                                | Q9FPF0 | 8.92 | 529.2 |               |               |           |       | 18            | 18            |
| Protein ECERIFERUM 3                                                                  | Q8H1Z0 | 8.20 | 453.7 |               |               |           |       |               | 0             |
| Protein phosphatase 2C and cyclic nucleotide-binding/kinase domain-containing protein | Q9SL76 | 3.63 | 373.1 |               |               | 12        | 24    | 12            | 12            |
| Protein STRICTOSIDINE SYNTHASE-LIKE 12                                                | P94111 | 7.37 | 359.4 | 18            | 24            | 0, 12     | 0     |               |               |
| Protein TSS                                                                           | F4JKH6 | 7.01 | 428.4 | 12            |               | 0, 12     |       | 0, 12         | 0, 18, 24     |
| Putative lipid phosphate phosphatase 3 chloroplastic                                  | Q8LFD1 | 4.93 | 307.6 | 12            |               | 12        |       |               | 12, 18        |
| Pyridoxal 5'-phosphate synthase subunit PDX1.3                                        | Q8L940 | 5.61 | 309.1 |               |               |           |       | 18            | 18            |
| Pyruvate kinase                                                                       | Q9SJQ0 | 6.10 | 337.9 |               | 24            |           |       | 18            | 0, 12, 18     |
| RAN GTPase-activating protein 1                                                       | Q9LE82 | 5.91 | 314.6 |               |               |           |       | 0, 18         | 18            |
| Ribose-phosphate pyrophosphokinase 4                                                  | Q680A5 | 9.10 | 466.4 |               |               |           |       | 24            | 18            |
| S-adenosyl-L-methionine-dependent methyltransferases superfamily protein              | Q8L788 | 8.23 | 413.3 |               |               |           |       | 0, 12, 24     | 0, 12         |
| S-adenosylmethionine synthase 1                                                       | P23686 | 7.15 | 304.6 | 0, 24         | 0, 24         | 12, 24    |       | 18            |               |
| Serine/arginine-rich splicing factor RSZ22                                            | O81126 | 7.52 | 411.2 |               |               |           |       | 12            | 0, 12         |
| Serine/threonine-protein phosphatase 2A 65 kDa regulatory subunit A alpha isoform     | Q38845 | 7.44 | 330.2 | 0, 12, 18, 24 | 0, 12, 18, 24 |           |       | 0, 18         | 18, 24        |
| Serine/threonine-protein phosphatase 2A 65 kDa regulatory subunit A gamma isoform     | Q38951 | 6.34 | 340.6 | 0, 18         | 0, 18, 24     |           |       | 0             |               |

|                                                                                           |        |      |       |        |        |               |               |               |               |
|-------------------------------------------------------------------------------------------|--------|------|-------|--------|--------|---------------|---------------|---------------|---------------|
| Signal peptidase I                                                                        | Q9LW08 | 3.91 | 321.2 |        |        |               |               | 12            |               |
| Sorbitol dehydrogenase                                                                    | Q9FJ95 | 8.66 | 569.1 |        |        |               |               | 0, 12, 18     | 0, 18, 24     |
| Spermidine synthase 2                                                                     | O48661 | 6.89 | 363.1 |        |        | 0, 12         | 0             |               |               |
| Staphylococcal-like nuclease<br>CAN2                                                      | F4IH31 | 5.43 | 313.5 |        |        | 0             |               |               |               |
| Sterol 14-demethylase                                                                     | Q9SAA9 | 5.17 | 316.8 | 12, 18 |        |               |               |               |               |
| Sterol 3-beta-<br>glucosyltransferase UGT80A2                                             | Q9M8Z7 | 7.27 | 413.1 | 0, 12  |        | 0, 18         | 0, 24         | 0, 12, 18     | 0, 12, 18, 24 |
| Succinate--CoA ligase [ADP-<br>forming] subunit alpha-1<br>mitochondrial                  | P68209 | 7.21 | 344.0 | 12, 24 | 18, 24 |               |               |               |               |
| Sucrose-phosphate synthase 1                                                              | Q94BT0 | 4.50 | 305.5 | 0      |        | 0, 12         | 0             | 0, 12, 18, 24 | 0, 12, 18     |
| Sulfoquinovosyl transferase<br>SQD2                                                       | Q8S4F6 | 6.65 | 393.6 |        |        | 0, 12, 18     | 0, 12, 18     |               |               |
| Temperature-sensitive sn-2<br>acyl-lipid omega-3 desaturase<br>(ferredoxin) chloroplastic | P48622 | 7.74 | 307.6 | 12     |        |               |               |               |               |
| Thiamine thiazole synthase<br>chloroplastic                                               | Q38814 | 6.90 | 404.6 |        |        | 0             | 18            | 18            | 18            |
| Thioredoxin-like protein<br>HCF164 chloroplastic                                          | O23166 | 7.77 | 373.8 | 24     | 12, 18 |               |               |               | 18            |
| Tropinone reductase homolog<br>At5g06060                                                  | Q9LHT0 | 4.23 | 352.0 |        |        | 12            | 24            |               | 18            |
| <b>Ubiquitin-activating enzyme<br/>E1 1</b>                                               | P93028 | 7.45 | 381.2 |        |        |               |               | 12            | 0, 18         |
| <b>Ubiquitin-conjugating<br/>enzyme 36</b>                                                | F4I615 | 7.31 | 336.9 |        | 18, 24 |               |               |               |               |
| <b>Ubiquitin-NEDD8-like<br/>protein RUB1</b>                                              | Q9SHE7 | 9.01 | 450.9 | 12, 24 | 0      | 0, 18         | 12, 18        |               |               |
| U-box domain-containing<br>protein 44                                                     | Q9LM76 | 5.98 | 304.3 |        |        |               | 0, 18, 24     | 0, 12         | 0, 12, 18     |
| Xyloglucan<br>glycosyltransferase 4                                                       | Q9LJP4 | 3.89 | 307.1 |        |        |               |               |               | 0             |
| <b>Perception and Signalling</b>                                                          |        |      |       |        |        |               |               |               |               |
| 14-3-3-like protein GF14<br>epsilon                                                       | P48347 | 8.62 | 404.6 |        |        |               |               | 0, 18         | 0, 12, 18, 24 |
| 14-3-3-like protein GF14<br>upsilon                                                       | P42645 | 6.75 | 417.0 |        |        |               |               | 12, 24        | 0, 24         |
| Adenosine kinase 2                                                                        | Q9LZG0 | 9.20 | 471.7 |        |        |               |               | 24            |               |
| At4g32250/F10M6_110                                                                       | Q8RWX4 | 4.82 | 366.8 | 12     |        | 12            |               |               |               |
| AT5G05670 protein                                                                         | Q9FFK7 | 7.15 | 322.7 |        |        | 0, 12, 18     | 12            | 0, 18, 24     | 0, 12, 18     |
| ATMRK1                                                                                    | O22100 | 4.18 | 310.0 |        | 18     | 12, 18        |               |               |               |
| Auxin-induced in root<br>cultures protein 12                                              | Q94BT2 | 6.52 | 308.8 | 18, 24 | 18, 24 | 0, 12, 18, 24 | 0, 12, 18, 24 | 18            | 18            |
| Calcium-binding EF hand<br>family protein                                                 | Q9FNN0 | 6.24 | 339.0 |        |        |               |               | 12, 18        | 0             |
| <b>Calcium-dependent protein<br/>kinase 13</b>                                            | Q8W4I7 | 4.55 | 325.9 |        |        |               |               | 0             | 0             |

|                                                                         |        |      |       |               |               |               |               |       |               |
|-------------------------------------------------------------------------|--------|------|-------|---------------|---------------|---------------|---------------|-------|---------------|
| Calcium-dependent protein kinase 29                                     | Q8RWL2 | 6.09 | 339.2 |               |               |               |               | 0, 12 | 0, 12         |
| Calcium-dependent protein kinase 3                                      | Q42479 | 7.76 | 409.6 |               |               | 0, 12, 18, 24 | 0, 12, 18, 24 |       |               |
| Calcium-dependent protein kinase 32                                     | Q6NLQ6 | 7.75 | 307.7 | 0, 12, 18, 24 | 18, 24        |               |               |       |               |
| Calcium-dependent protein kinase 33                                     | Q9C6P3 | 7.95 | 313.7 |               | 12            |               |               |       |               |
| Calcium-dependent protein kinase 5                                      | Q38871 | 6.82 | 301.2 | 12            |               | 12, 24        | 24            | 0     | 0, 12, 18, 24 |
| Calcium-dependent protein kinase 7                                      | Q38873 | 4.59 | 310.2 | 12            |               | 0             |               |       |               |
| Calcium-dependent protein kinase 8                                      | Q42438 | 4.59 | 310.2 | 12            |               | 0             |               |       |               |
| Calcium-dependent protein kinase 9                                      | Q38868 | 7.80 | 307.5 | 12, 24        | 18, 24        | 12            | 0, 18, 24     |       |               |
| CBL-interacting serine/threonine-protein kinase 26                      | Q84VQ3 | 6.89 | 409.4 |               |               |               |               | 0     | 18            |
| CDPK-related kinase 1                                                   | O80673 | 7.51 | 347.1 |               |               |               |               |       | 12            |
| Chitin elicitor receptor kinase 1 (CERK1)                               | A8R7E6 | 4.67 | 311.0 |               |               |               | 0, 24         | 0, 12 | 0, 12, 18, 24 |
| Cysteine-rich receptor-like protein kinase 17                           | Q8L710 | 4.46 | 360.2 | 18            | 0, 12, 18, 24 | 0, 12, 24     | 0, 24         | 12    | 0, 12         |
| Cysteine-rich receptor-like protein kinase 18                           | Q8RX80 | 4.97 | 372.7 |               |               |               | 0             |       |               |
| Cysteine-rich receptor-like protein kinase 19                           | Q8GWJ7 | 3.87 | 357.4 |               |               | 18            |               |       |               |
| Cysteine-rich receptor-like protein kinase 2                            | Q9CAL3 | 6.17 | 339.9 | 12            | 18            | 12            | 0, 18, 24     |       |               |
| Cysteine-rich receptor-like protein kinase 21                           | Q3E9X6 | 4.99 | 327.4 |               |               |               |               |       | 0, 12         |
| Cysteine-rich receptor-like protein kinase 3                            | Q9CAL2 | 8.29 | 455.9 |               |               |               |               |       | 0             |
| Cysteine-rich receptor-like protein kinase 4                            | Q9LZU4 | 3.87 | 357.4 |               |               | 18            |               |       |               |
| Cysteine-rich receptor-like protein kinase 41                           | O23081 | 4.59 | 365.2 |               |               |               |               | 0     | 0             |
| Cysteine-rich receptor-like protein kinase 6                            | Q9C5S9 | 6.77 | 361.6 |               |               |               |               | 18    | 12            |
| Cysteine-rich receptor-like protein kinase 8                            | O65468 | 6.77 | 361.6 |               |               |               |               | 18    | 12            |
| Diacylglycerol kinase 3                                                 | Q8VZG1 | 7.41 | 303.4 |               |               | 24            | 12, 18, 24    |       |               |
| Diacylglycerol kinase 7                                                 | F4JQ95 | 7.96 | 361.8 |               | 18            | 0             | 0             |       |               |
| ERBB-3 BINDING PROTEIN 1                                                | Q96327 | 7.44 | 415.0 |               |               | 0, 12, 24     | 12, 24        | 18    | 18            |
| GF14 protein phi chain                                                  | F4HWQ5 | 8.58 | 546.3 |               |               |               |               | 18    | 18            |
| G-type lectin S-receptor-like serine/threonine-protein kinase At1g61440 | O64776 | 2.43 | 306.9 |               |               |               |               |       | 18            |

|                                                                                          |        |      |       |               |               |        |        |                       |
|------------------------------------------------------------------------------------------|--------|------|-------|---------------|---------------|--------|--------|-----------------------|
| <b>G-type lectin S-receptor-like serine/threonine-protein kinase At2g19130</b>           | O64477 | 2.72 | 306.8 |               |               | 0, 12  |        |                       |
| <b>G-type lectin S-receptor-like serine/threonine-protein kinase At4g03230</b>           | Q9ZR08 | 5.05 | 407.7 |               |               |        |        | 12                    |
| G-type lectin S-receptor-like serine/threonine-protein kinase SD1-29                     | O64782 | 6.52 | 361.9 |               |               | 24     |        |                       |
| Histidine kinase 3                                                                       | Q9C5U1 | 3.65 | 324.9 |               |               |        | 18     | 0, 18                 |
| <b>Inactive LRR receptor-like serine/threonine-protein kinase BIR2</b>                   | Q9LSI9 | 7.22 | 471.6 |               |               | 12, 18 |        |                       |
| Inositol hexakisphosphate and diphosphoinositol-pentakisphosphate kinase VIP1            | F4J8C6 | 4.61 | 333.3 |               |               |        | 0      | 0, 18                 |
| Integrin-linked protein kinase family                                                    | F4J703 | 5.96 | 346.7 |               |               |        | 12     | 0                     |
| Kinase like protein                                                                      | O23334 | 6.07 | 313.9 |               |               | 0      | 0      |                       |
| Kinase with tetratricopeptide repeat domain-containing protein                           | A8MQ88 | 5.29 | 355.0 | 12            |               |        |        | 12                    |
| LEAF RUST 10 DISEASE-RESISTANCE LOCUS RECEPTOR-LIKE PROTEIN KINASE-like 1.4              | F4HQ17 | 5.14 | 371.3 |               |               |        |        | 0                     |
| Leucine-rich repeat protein kinase family protein                                        | F4IB69 | 3.94 | 346.6 |               |               |        | 18, 24 | 18                    |
| Leucine-rich repeat protein kinase family protein (Fragment)                             | C0LGM1 | 6.12 | 332.2 |               |               | 12     | 12     | 12, 18, 0, 12, 18, 24 |
| <b>Leucine-rich repeat receptor-like serine/threonine/tyrosine-protein kinase SOBIR1</b> | Q9SKB2 | 8.17 | 409.1 | 12            | 0             |        |        |                       |
| Leucine-rich repeat receptor-like serine/threonine-protein kinase BAM1                   | O49545 | 7.05 | 501.0 | 0, 12, 18, 24 | 0, 12, 18, 24 |        |        |                       |
| Long-chain base (LCB) kinase 1                                                           | B3H501 | 9.60 | 459.8 |               |               |        |        | 18, 24                |
| LRR receptor-like serine/threonine-protein kinase GSO2                                   | Q9FIZ3 | 1.48 | 329.6 |               |               | 12     | 12     |                       |
| LRR receptor-like serine/threonine-protein kinase HSL2                                   | C0LGX3 | 2.90 | 387.8 |               |               |        | 24     |                       |



|                                                                      |        |       |       |               |            |            |           |               |
|----------------------------------------------------------------------|--------|-------|-------|---------------|------------|------------|-----------|---------------|
| L-type lectin-domain containing receptor kinase IV.3                 | O81292 | 1.93  | 308.0 |               |            |            | 0         |               |
| L-type lectin-domain containing receptor kinase IV.4                 | O81291 | 5.34  | 359.3 |               |            |            | 0, 12, 18 | 0, 12, 24     |
| L-type lectin-domain containing receptor kinase S.1                  | Q9M9E0 | 4.03  | 317.7 |               | 24         | 12         | 12        |               |
| L-type lectin-domain containing receptor kinase VII.1                | Q9S9U1 | 3.53  | 313.8 | 18            |            |            |           |               |
| LysM domain receptor-like kinase 3 (LYK3)                            | F4IB81 | 5.03  | 306.2 |               |            |            | 24        | 0, 12         |
| LysM domain receptor-like kinase 4 (LYK4)                            | O64825 | 7.20  | 309.8 |               |            |            | 18        |               |
| MAP3K epsilon protein kinase 1                                       | Q9LJD8 | 7.37  | 404.9 | 12, 18, 24    | 12, 18, 24 |            | 0, 12     | 0             |
| Mitogen-activated protein kinase 2                                   | Q9S7U9 | 6.81  | 303.7 | 0             | 0          | 18         |           |               |
| Phosphatidylinositol 4-kinase alpha 1                                | Q9SXA1 | 7.07  | 319.7 |               |            | 12         |           |               |
| Phosphoinositide phospholipase C                                     | F4IX90 | 13.43 | 717.2 |               |            |            | 18        |               |
| Phosphoinositide phospholipase C 1                                   | Q39032 | 7.46  | 361.1 |               | 12         |            |           |               |
| Probable calcium-binding protein CML20                               | O82659 | 7.09  | 359.3 | 0, 12, 18, 24 | 0, 12      | 12, 24     |           |               |
| Probable inactive receptor kinase At1g27190 BIR3                     | O04567 | 7.37  | 358.9 |               |            | 12, 18, 24 | 0, 18     | 0, 12, 18, 24 |
| Probable inactive receptor kinase At3g08680                          | Q9C9Y8 | 6.93  | 354.3 | 0             |            |            |           |               |
| Probable inactive receptor kinase At5g10020                          | Q0WR59 | 1.88  | 342.3 |               |            |            | 18        | 18            |
| Probable inactive receptor kinase RLK902                             | Q9LVI6 | 8.12  | 409.3 | 12, 18, 24    | 18, 24     |            | 18        | 18            |
| Probable LRR receptor-like serine/threonine-protein kinase At1g06840 | C0LGD7 | 7.72  | 336.7 | 24            | 18         |            |           |               |
| Probable LRR receptor-like serine/threonine-protein kinase At1g12460 | C0LGE4 | 1.70  | 314.7 |               |            |            | 18        |               |
| Probable LRR receptor-like serine/threonine-protein kinase At1g53430 | C0LGG8 | 6.98  | 444.5 | 24            | 0, 12, 24  |            | 0, 12, 18 | 12, 18, 24    |
| Probable LRR receptor-like serine/threonine-protein kinase At1g53440 | C0LGG9 | 7.57  | 434.1 |               |            |            | 0, 12, 18 | 0             |

|                                                                                   |        |      |       |            |        |               |           |           |           |
|-----------------------------------------------------------------------------------|--------|------|-------|------------|--------|---------------|-----------|-----------|-----------|
| Probable LRR receptor-like serine/threonine-protein kinase At1g56140              | C0LGH3 | 2.58 | 381.3 |            |        | 0             |           | 12, 18    | 12        |
| Probable receptor-like protein kinase At1g30570                                   | Q9SA72 | 5.90 | 301.2 | 18         |        |               |           |           |           |
| Probable receptor-like protein kinase At1g49730                                   | Q9FX99 | 6.64 | 328.2 | 18         | 24     | 12            |           |           | 12        |
| Probable receptor-like protein kinase At2g23200                                   | O22187 | 7.69 | 311.9 | 12         |        |               |           |           |           |
| Probable receptor-like protein kinase At5g18500                                   | Q8LEB6 | 6.28 | 304.1 | 24         | 18, 24 | 0             | 0, 24     |           |           |
| Probable receptor-like protein kinase At5g38990                                   | Q9FID9 | 8.16 | 399.5 | 12         | 18, 24 | 0, 18, 24     | 0, 24     | 0, 12, 18 | 0, 18, 24 |
| Probable serine/threonine protein kinase IREH1                                    | F4J6F6 | 6.99 | 392.1 |            |        |               |           | 12        |           |
| Probable serine/threonine-protein kinase At1g54610                                | Q9ZVM9 | 8.62 | 407.6 |            |        |               |           | 0         | 0         |
| Probable serine/threonine-protein kinase CST                                      | P27450 | 8.35 | 448.2 |            |        |               |           | 0, 12     | 0, 12     |
| Probable serine/threonine-protein kinase PBL1                                     | Q8H186 | 6.68 | 337.0 |            |        |               |           |           | 18        |
| Probable serine/threonine-protein kinase PBL11                                    | P43293 | 5.94 | 300.4 |            |        |               | 0, 24     | 0         | 0         |
| Probable serine/threonine-protein kinase PBL2                                     | O49839 | 3.26 | 346.8 |            |        | 0             |           |           |           |
| Probable serine/threonine-protein kinase PBL22                                    | Q9SFX0 | 3.90 | 354.8 |            |        | 12            | 24        |           |           |
| Probable serine/threonine-protein kinase PBL24                                    | Q1PE89 | 3.83 | 346.1 |            |        |               | 12        |           |           |
| Probable serine/threonine-protein kinase PBL3                                     | O49840 | 3.26 | 346.8 |            |        | 0             |           |           |           |
| Probable serine/threonine-protein kinase PBL7                                     | Q0WRY5 | 3.20 | 347.4 |            |        |               | 18        |           |           |
| Probably inactive leucine-rich repeat receptor-like protein kinase At3g28040      | Q9LRT1 | 7.17 | 325.0 |            | 18     |               |           | 18        | 0, 12, 18 |
| Probably inactive leucine-rich repeat receptor-like protein kinase BIR1 At5g48380 | Q9ASS4 | 7.73 | 465.4 |            |        | 18            | 18, 24    |           |           |
| Proline-rich receptor-like protein kinase PERK2                                   | Q9LK03 | 2.35 | 329.1 |            |        |               | 0         |           |           |
| Proline-rich receptor-like protein kinase PERK3                                   | Q1PEM5 | 9.02 | 389.4 | 12         |        |               |           |           |           |
| Protein BRASSINOSTEROID INSENSITIVE 1                                             | O22476 | 7.31 | 340.1 |            |        |               |           | 12        | 0         |
| Protein kinase                                                                    | Q9FGB1 | 2.92 | 301.6 | 12, 18, 24 | 24     | 12            | 24        |           | 0         |
| Protein kinase superfamily protein At1g48210                                      | F4HWU0 | 8.70 | 559.9 |            |        | 0, 12, 18, 24 | 0, 18, 24 | 0         | 0, 12, 18 |

|                                                                                      |        |      |       |        |           |           |       |               |               |
|--------------------------------------------------------------------------------------|--------|------|-------|--------|-----------|-----------|-------|---------------|---------------|
| Protein kinase superfamily protein At1g52540                                         | Q8LDB7 | 7.41 | 379.9 | 12, 18 | 0         | 12        | 0     |               |               |
| Protein kinase superfamily protein At1g65190                                         | Q9S9J9 | 4.27 | 366.6 |        |           |           |       | 12            | 12            |
| Protein kinase superfamily protein At3g26700                                         | F4JDN8 | 5.17 | 385.8 |        | 18        |           |       | 0, 12, 18     | 0, 24         |
| Protein kinase superfamily protein At4g01330                                         | F4JI10 | 3.48 | 321.3 |        | 18        |           |       |               |               |
| Protein kinase superfamily protein At5g14720                                         | Q84WU5 | 4.94 | 306.6 |        |           |           |       |               | 0             |
| Protein kinase superfamily protein Atg49730                                          | F4I3D1 | 6.64 | 328.2 | 18     | 24        | 12        |       |               | 12            |
| Protein STRUBBELIG-RECEPTOR FAMILY 6                                                 | Q9C8M9 | 5.38 | 346.7 |        |           |           |       | 0, 18         | 18            |
| PTI1-like tyrosine-protein kinase 1                                                  | Q8H1G6 | 7.66 | 372.1 | 18     |           | 0, 12, 24 | 0, 24 |               |               |
| PTI1-like tyrosine-protein kinase 2                                                  | O49339 | 7.07 | 373.9 |        | 0, 12, 18 |           |       | 0, 12, 18     | 0, 12, 18, 24 |
| PTI1-like tyrosine-protein kinase At3g15890                                          | Q9LSC2 | 7.41 | 379.9 | 12, 18 | 0         | 12        | 0     |               |               |
| <b>Putative cysteine-rich receptor-like protein kinase 12</b>                        | O65472 | 4.21 | 344.3 | 24     |           |           |       |               |               |
| <b>Putative cysteine-rich receptor-like protein kinase 30</b>                        | Q9LDT0 | 1.52 | 344.1 | 12     | 12, 18    |           | 0, 18 |               |               |
| <b>Putative cysteine-rich receptor-like protein kinase 31</b>                        | Q9LDM5 | 1.52 | 344.1 | 12     | 12, 18    |           |       |               |               |
| Putative leucine-rich repeat receptor-like serine/threonine-protein kinase At2g04300 | Q9SI06 | 2.11 | 307.1 |        |           |           |       |               | 0             |
| Putative proline-rich receptor-like protein kinase PERK6                             | Q9LS95 | 3.02 | 345.7 |        | 24        |           |       |               |               |
| Putative receptor-like protein kinase At5g39000                                      | Q9FID8 | 8.16 | 399.5 | 12     |           |           |       |               |               |
| Receptor protein kinase TMK1                                                         | P43298 | 7.31 | 334.4 |        |           | 0, 12     |       | 0, 12, 18, 24 | 0, 12, 18, 24 |
| <b>Receptor-like protein 51 RLP51</b>                                                | Q9SN38 | 7.39 | 359.0 |        |           |           |       | 18            | 18            |
| Receptor-like protein kinase At5g59670                                               | Q9FN94 | 6.44 | 395.1 |        |           |           |       |               | 0, 24         |
| Receptor-like protein kinase HERK 1                                                  | Q9LX66 | 7.31 | 377.8 |        |           |           |       | 0, 12, 18, 24 | 0, 12, 18, 24 |
| Receptor-like protein kinase HSL1                                                    | Q9SGP2 | 4.99 | 305.9 | 12     | 18, 24    | 0, 12     |       |               | 18            |
| Receptor-like protein kinase THESEUS 1                                               | Q9LK35 | 7.37 | 321.8 | 0, 18  |           |           |       |               |               |

|                                                                                  |        |      |       |            |           |           |           |           |           |
|----------------------------------------------------------------------------------|--------|------|-------|------------|-----------|-----------|-----------|-----------|-----------|
| Receptor-like serine/threonine-protein kinase SD1-7                              | Q39086 | 5.79 | 395.7 |            |           |           |           |           | 0         |
| <b>Serine/threonine-protein kinase BSK2</b>                                      | Q9LS26 | 3.03 | 315.8 | 24         |           | 0         |           |           | 18        |
| <b>Serine/threonine-protein kinase BSK3</b>                                      | Q8W4L3 | 3.50 | 315.0 |            | 18, 24    |           |           |           |           |
| <b>Serine/threonine-protein kinase BSK5</b>                                      | Q9FIL1 | 5.29 | 355.0 | 12         |           |           |           | 0         | 12        |
| <b>Serine/threonine-protein kinase BSK6</b>                                      | Q9M324 | 6.18 | 310.8 |            |           |           |           | 12        |           |
| <b>Serine/threonine-protein kinase BSK8</b>                                      | Q9FHD7 | 4.48 | 323.2 |            | 12        |           | 0         |           |           |
| Serine/threonine-protein kinase CDG1                                             | Q9LSE1 | 4.08 | 342.0 | 24         |           |           |           |           |           |
| <b>Serine/threonine-protein kinase PBL27</b>                                     | Q1PDV6 | 3.79 | 359.4 | 18         | 18        |           |           |           |           |
| Serine/threonine-protein kinase PBS1                                             | Q9FE20 | 3.77 | 351.4 |            |           |           |           | 0         |           |
| <b>Serine/threonine-protein kinase RIPK</b>                                      | Q9ZUF4 | 4.08 | 341.4 | 0, 12      | 0, 12, 24 | 18, 24    |           |           |           |
| Serine/threonine-protein phosphatase 2A 65 kDa regulatory subunit A beta isoform | Q38950 | 8.50 | 450.9 |            |           |           |           |           | 0         |
| Signal recognition particle 54 kDa protein chloroplastic                         | P37107 | 7.11 | 452.3 |            |           |           |           | 18        |           |
| <b>Somatic embryogenesis receptor kinase 2 (SERK2)</b>                           | Q9XIC7 | 7.93 | 341.8 |            | 12        |           |           |           |           |
| <b>Somatic embryogenesis receptor kinase 4 (SERK4)/BKK1</b>                      | Q9SKG5 | 5.73 | 338.5 |            |           |           |           | 0, 12, 18 | 0         |
| STRUBBELIG-receptor family 6                                                     | A8MQH3 | 7.96 | 470.2 |            |           |           |           | 0, 18     | 0, 18     |
| Wall-associated receptor kinase 2                                                | Q9LMP1 | 7.16 | 381.4 | 12, 18, 24 |           | 12        | 0, 12     | 12        | 12        |
| Wall-associated receptor kinase 4                                                | Q9LMN6 | 7.15 | 372.4 |            | 12, 18    |           |           |           |           |
| Wall-associated receptor kinase 5                                                | Q9LMN7 | 9.31 | 539.8 |            |           |           |           | 12        | 0, 12, 24 |
| <b>Stress and Defence Response</b>                                               |        |      |       |            |           |           |           |           |           |
| 2-Cys peroxiredoxin BAS1-like chloroplastic                                      | Q9C5R8 | 7.02 | 567.2 |            |           | 0, 12, 24 | 18, 24    |           |           |
| Ankyrin repeat-containing protein 2                                              | F4JN13 | 6.95 | 329.8 | 12, 18, 24 | 0         | 12        | 0         |           |           |
| At2g44060                                                                        | O80576 | 6.96 | 538.6 |            |           |           |           | 0, 12, 18 | 0, 18, 24 |
| AT4g34150/F28A23_90                                                              | Q945K9 | 6.89 | 359.6 | 12, 24     | 12        | 0, 12, 24 | 0, 12, 24 |           |           |
| AT4g34180/F28A23_60                                                              | Q93V74 | 9.13 | 452.9 |            |           |           |           | 18        |           |

|                                                              |        |      |       |               |               |               |               |               |               |
|--------------------------------------------------------------|--------|------|-------|---------------|---------------|---------------|---------------|---------------|---------------|
| BAG family molecular chaperone regulator 8 chloroplastic     | Q9LIB3 | 6.95 | 395.0 |               |               |               |               | 0             | 0, 12         |
| Binding partner of ACD11 1                                   | Q9LFD5 | 6.26 | 420.0 | 0, 12         | 0, 12, 18, 24 | 0, 12, 18, 24 | 0, 12, 18, 24 |               |               |
| Chaperone protein dnaJ 2                                     | P42825 | 5.53 | 332.8 |               |               |               | 18            |               |               |
| Chaperone protein dnaJ 3                                     | Q94AW8 | 5.36 | 363.8 |               |               | 0, 12         | 0, 18         |               |               |
| Chaperonin 60 subunit beta 1 chloroplastic                   | P21240 | 7.10 | 498.4 |               |               |               |               | 0, 18, 24     | 0, 12, 18, 24 |
| Cold shock protein 2                                         | Q41188 | 7.84 | 306.8 | 24            | 0             |               | 0             |               |               |
| Cold-regulated 413 plasma membrane protein 1                 | Q9XIM7 | 6.27 | 375.1 |               |               |               |               | 0             | 12, 18, 24    |
| Cold-responsive protein kinase 1                             | Q93YN1 | 6.59 | 401.8 |               |               |               |               | 0             | 0             |
| Cysteine proteinase inhibitor 1                              | Q945Q1 | 8.76 | 533.9 | 0, 12, 18, 24 | 0, 12, 18     | 12, 18        |               |               |               |
| DCD (Development and Cell Death) domain protein              | F4K518 | 4.66 | 363.8 |               |               |               |               | 0             | 12            |
| DEAD-box ATP-dependent RNA helicase 38                       | Q93ZG7 | 7.97 | 400.1 | 12, 18        |               |               |               | 18            | 18            |
| Derlin-1                                                     | Q8VZU9 | 4.30 | 309.2 | 0             |               |               |               | 12            | 0, 12         |
| Disease resistance protein RPP8                              | Q8W4J9 | 5.53 | 370.9 | 12            |               | 0, 12, 18, 24 | 0, 12, 18, 24 |               |               |
| Disease resistance RPP13-like protein 4                      | Q38834 | 7.03 | 479.9 |               |               |               |               | 0, 12         | 0, 12         |
| DnaJ protein P58IPK homolog                                  | Q9LYW9 | 6.39 | 461.6 |               |               |               |               | 0, 12         | 0, 12         |
| Glutathione S-transferase DHAR1 mitochondrial                | Q9FWR4 | 5.05 | 380.8 |               |               |               |               | 18            |               |
| Glutathione S-transferase U5                                 | P46421 | 6.30 | 370.4 |               |               |               |               | 18            |               |
| Guanine nucleotide-binding protein subunit beta              | P49177 | 4.34 | 312.2 |               |               |               | 24            |               | 0             |
| Heat shock 70 kDa protein 14                                 | Q9S7C0 | 5.02 | 337.1 | 12, 18        | 18            |               |               |               |               |
| Heat shock 70 kDa protein 3                                  | O65719 | 7.48 | 427.5 |               |               | 12, 18, 24    | 0, 18, 24     |               |               |
| Heat shock protein 90-2                                      | P55737 | 5.24 | 370.2 |               |               |               |               | 24            | 0, 12, 18, 24 |
| Heat shock protein 90-3                                      | P51818 | 7.04 | 378.0 | 0             | 24            | 24            | 0, 12, 18, 24 |               |               |
| Hypersensitive-induced response protein 1                    | Q9FM19 | 6.33 | 420.1 |               |               |               |               | 0, 12, 18, 24 | 0, 12, 18, 24 |
| LRR and NB-ARC domains-containing disease resistance protein | Q2V4G0 | 3.71 | 366.9 |               |               |               |               |               | 0             |
| Metacaspase-4                                                | O64517 | 7.29 | 334.9 |               |               |               | 24            |               |               |
| MLO-like protein 1                                           | O49621 | 8.65 | 460.9 |               |               |               |               | 18            |               |
| MLO-like protein 2                                           | Q9SXB6 | 8.76 | 461.4 |               |               |               |               | 0, 12, 24     | 0, 12         |
| Nucleophosmin                                                | Q9SU93 | 6.72 | 425.5 | 0             |               |               | 12            | 0, 18, 24     | 0, 18         |
| Pectinesterase/pectinesterase inhibitor 3                    | O49006 | 6.67 | 396.3 | 18, 24        | 24            | 12, 24        | 0, 12, 24     |               |               |
| Phospholipase D gamma 1                                      | Q9T053 | 7.95 | 412.6 |               |               |               |               | 12            | 0, 12         |

|                                                                            |        |      |       |           |               |        |    |           |               |
|----------------------------------------------------------------------------|--------|------|-------|-----------|---------------|--------|----|-----------|---------------|
| <b>Probable disease resistance RPP8-like protein 4</b>                     | Q9FJK8 | 5.75 | 306.2 |           | 18, 24        |        |    |           |               |
| Probable glutathione peroxidase 2                                          | O04922 | 6.53 | 332.5 | 24        |               |        |    |           |               |
| Probable phospholipid hydroperoxide glutathione peroxidase 6 mitochondrial | O48646 | 7.11 | 443.2 | 0, 18, 24 | 0, 12, 18, 24 |        |    | 18        |               |
| Proline-rich receptor-like protein kinase PERK1                            | Q9LV48 | 5.25 | 336.3 | 18        |               | 12     | 0  | 0, 12, 24 | 0, 12, 18, 24 |
| Protein BONZAI 1                                                           | Q941L3 | 4.66 | 363.8 |           |               |        |    | 0         | 12            |
| Protein EARLY-RESPONSIVE TO DEHYDRATION 7 chloroplastic                    | O48832 | 9.01 | 446.5 | 12, 18    |               |        |    |           |               |
| <b>Protein SUPPRESSOR OF NPR1-1 CONSTITUTIVE 4</b>                         | D7SFH9 | 3.60 | 332.8 | 12        |               | 0      |    | 0, 18, 24 | 0, 12         |
| Protein-tyrosine-phosphatase PTP1                                          | O82656 | 4.98 | 310.2 |           |               | 0      |    |           |               |
| <b>Putative disease resistance protein RLP23</b>                           | O48849 | 7.38 | 307.1 |           |               | 12, 24 | 24 | 12        | 0, 12         |
| <b>Putative respiratory burst oxidase homolog protein J (RbohJ)</b>        | Q9LZU9 | 1.53 | 321.7 |           | 12            |        |    |           |               |
| <b>Respiratory burst oxidase homolog protein D (RbohD)</b>                 | Q9FIJ0 | 1.53 | 321.7 |           | 12            |        | 0  | 0, 12, 18 | 0, 12, 18, 24 |
| Ribonuclease TUDOR 1                                                       | Q8VZG7 | 5.61 | 349.8 | 0         |               |        |    | 0, 12, 18 | 18            |
| RNA-binding (RRM/RBD/RNP motifs) family protein                            | F4HVJ0 | 7.18 | 445.7 |           |               |        |    | 12        | 12            |
| RPM1-interacting protein 4                                                 | Q8GYN5 | 7.18 | 316.7 |           |               | 0, 12  |    |           |               |
| Superoxide dismutase [Fe] 1 chloroplastic                                  | P21276 | 7.80 | 443.5 |           |               |        |    |           | 0             |
| Tetraspanin-8                                                              | Q8S8Q6 | 5.71 | 361.5 |           |               |        |    | 0         |               |
| Thioredoxin H3                                                             | Q42403 | 6.82 | 389.8 |           |               |        |    | 0, 18, 24 | 0, 18         |
| Thioredoxin H5                                                             | Q39241 | 4.79 | 337.4 |           |               | 24     |    |           |               |
| Universal stress protein PHOS32                                            | Q8VYN9 | 5.03 | 341.9 | 18, 24    |               |        |    |           |               |

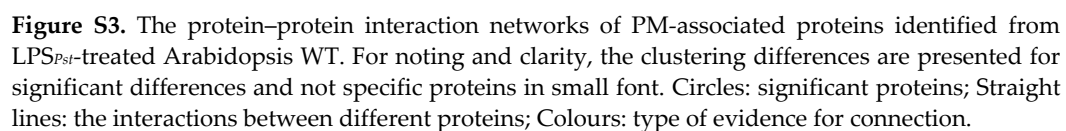



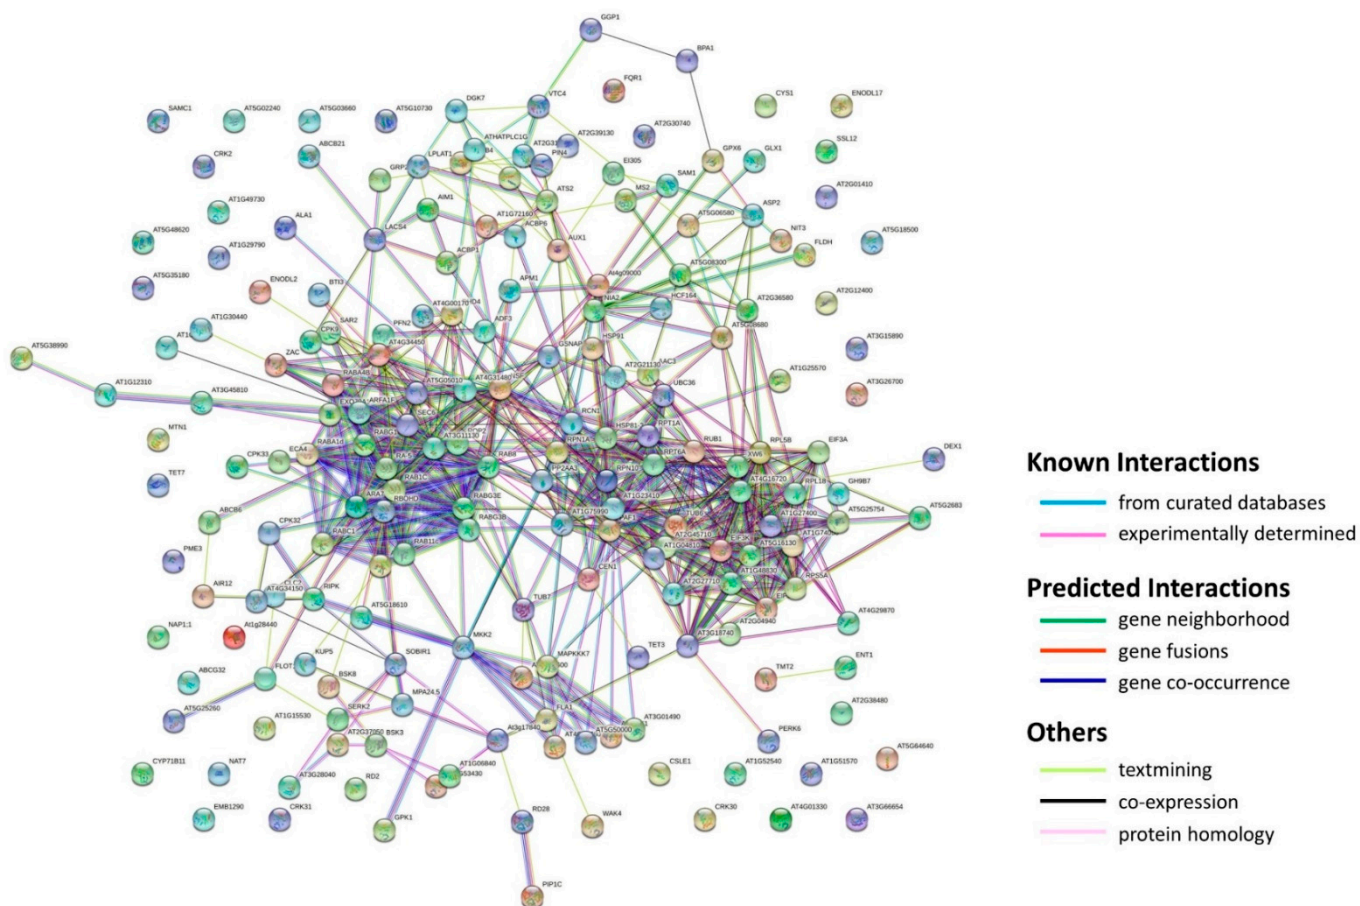

**Figure S4.** The protein–protein interaction networks of PM-associated proteins identified from LPS<sub>cc</sub>-treated Arabidopsis WT. Circles: significant proteins; Straight lines: the interactions between different proteins; Colours: type of evidence for connection.

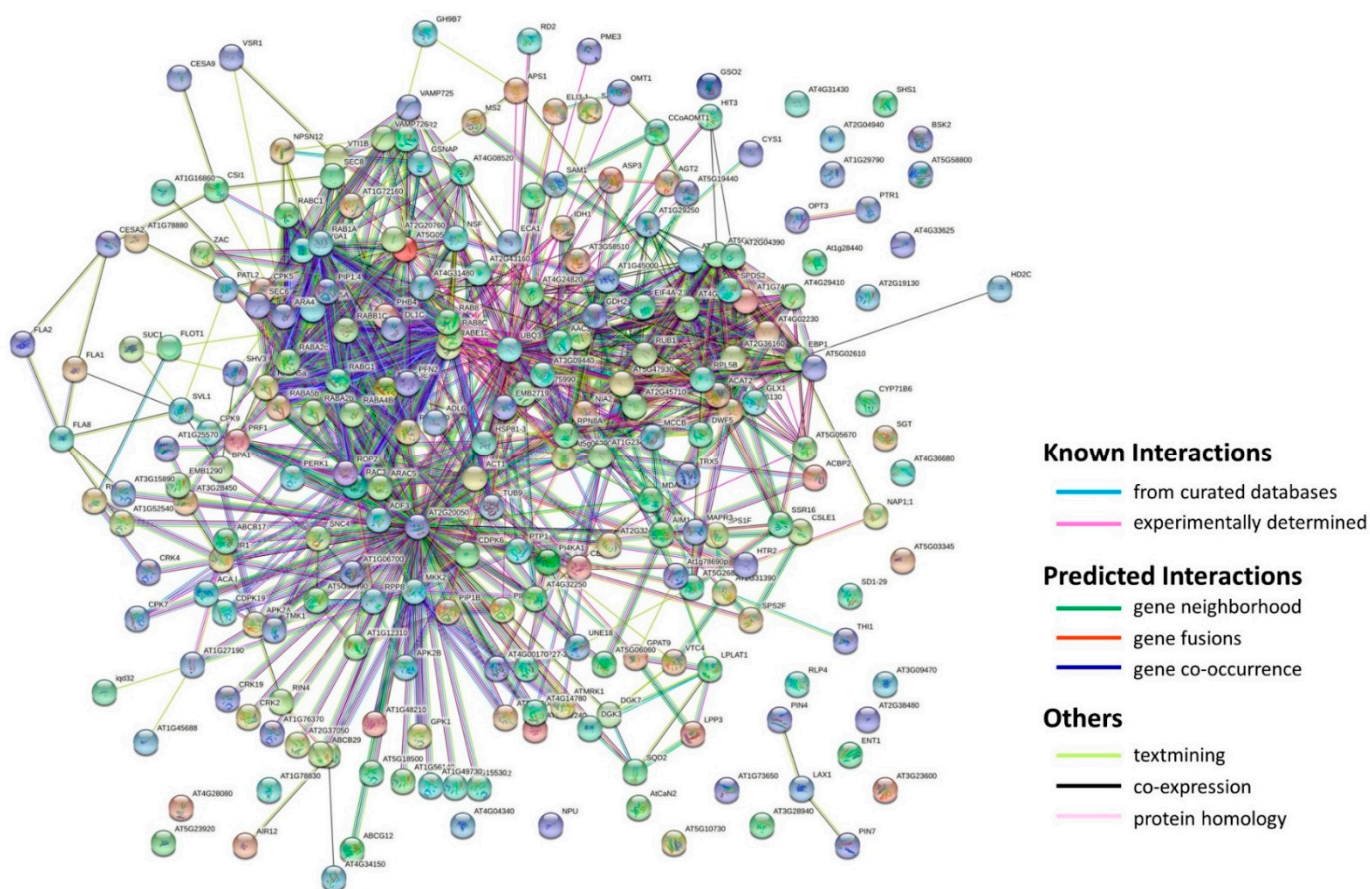

**Figure S5.** The protein–protein interaction networks of PM-associated proteins identified from LPS<sub>PSI</sub>-treated *Arabidopsis lbr2-2*. Circles: significant proteins; Straight lines: the interactions between different proteins; Colours: type of evidence for connection.

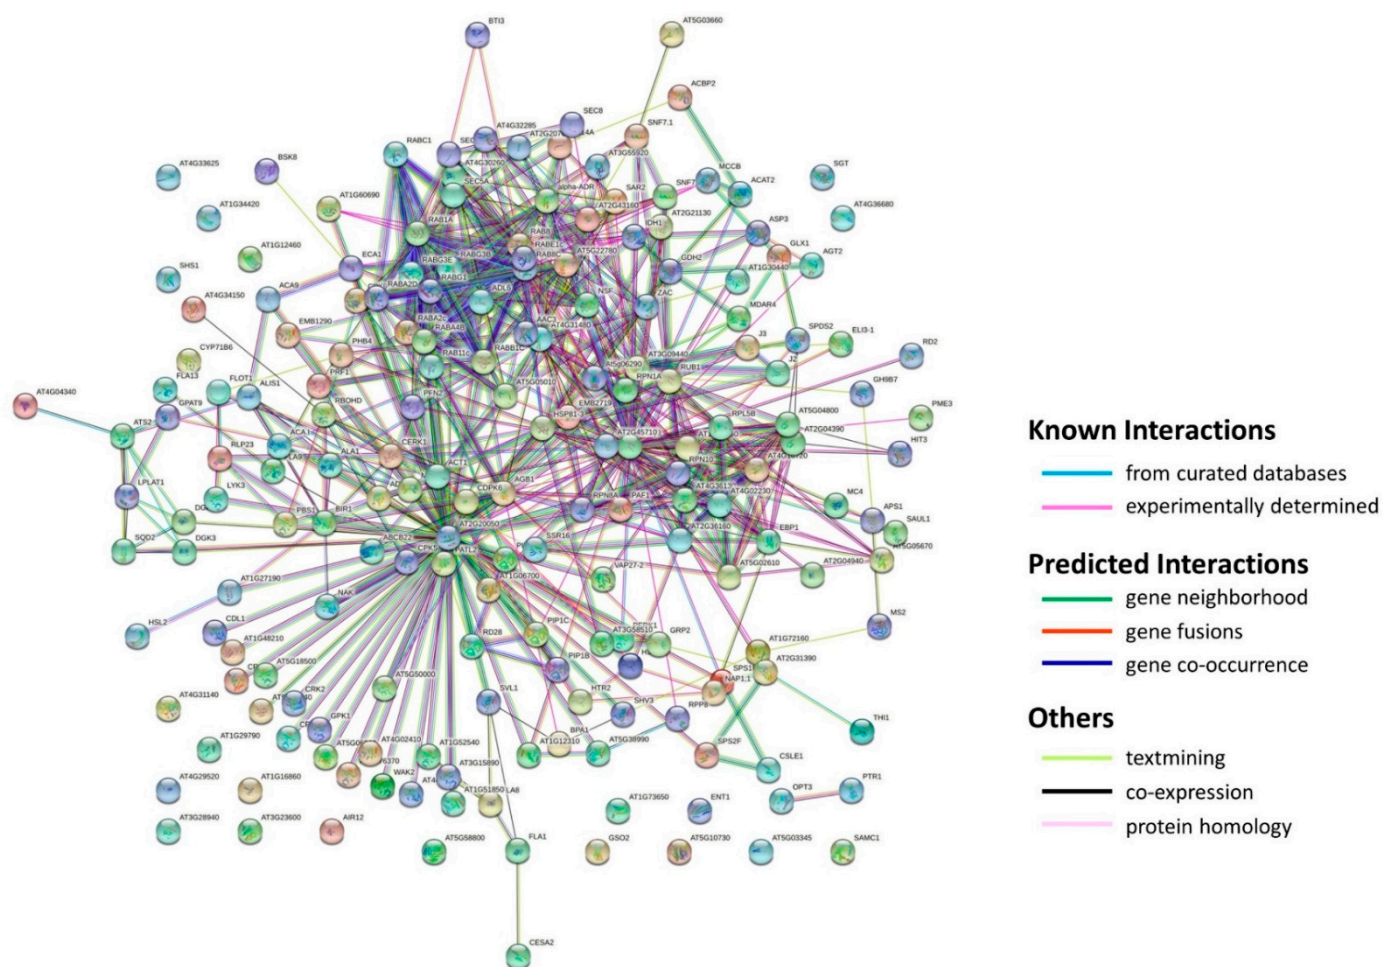

**Figure S6.** The protein-protein interaction networks of PM-associated proteins identified from LPS<sub>Xcc</sub>-treated *Arabidopsis lbr2-2*. Circles: significant proteins; Straight lines: the interactions between different proteins; Colours: type of evidence for connection.



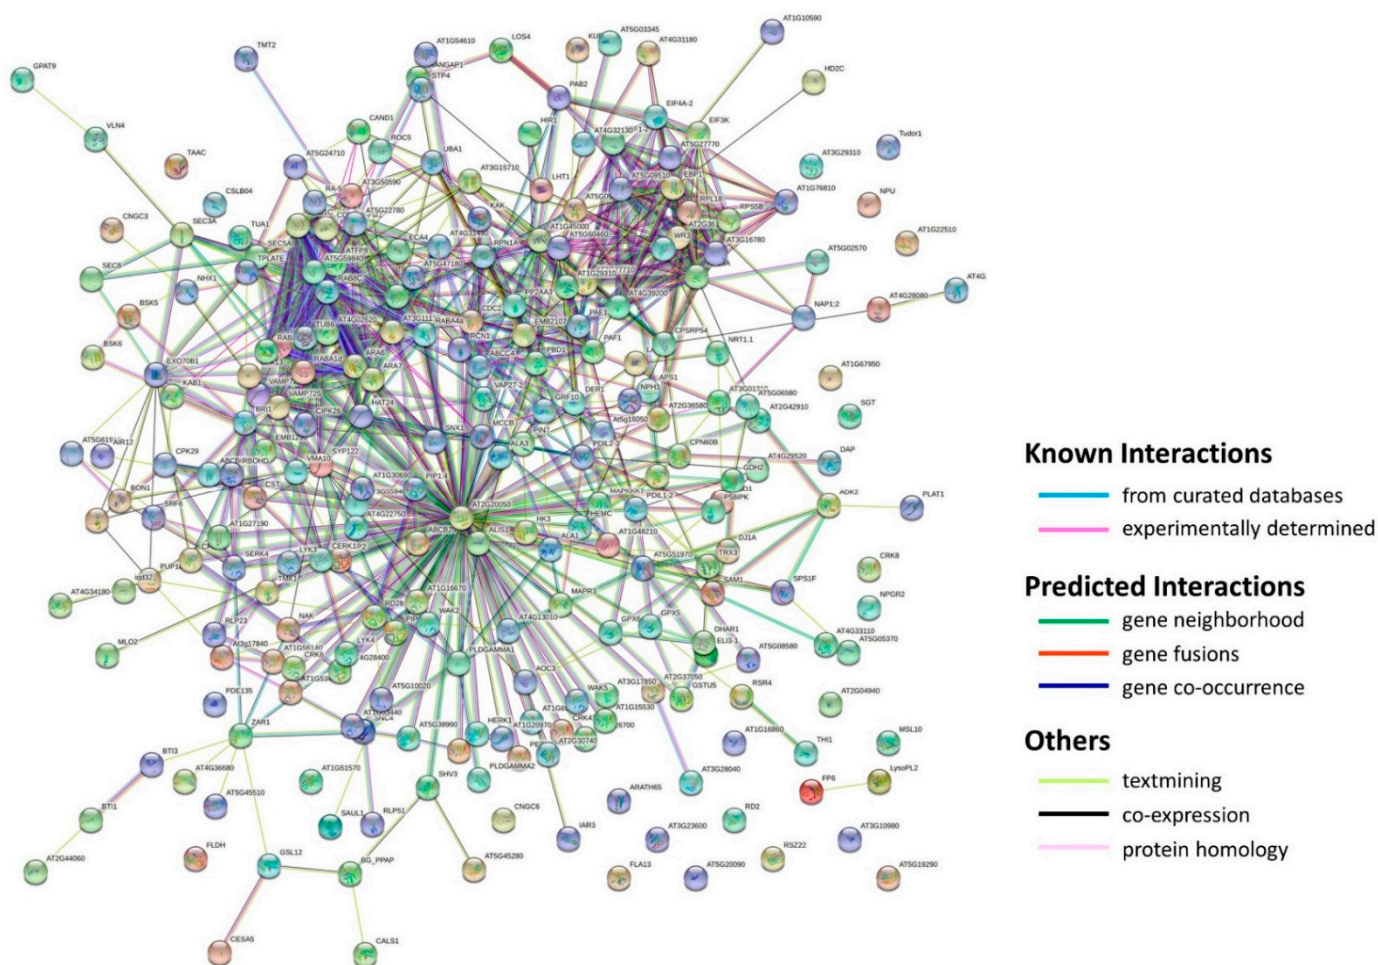

**Figure S7.** The protein–protein interaction networks of PM-associated proteins identified from LPS<sub>Pst</sub>-treated Arabidopsis *bak1-4*. Circles: significant proteins; Straight lines: the interactions between different proteins; Colours: type of evidence for connection.

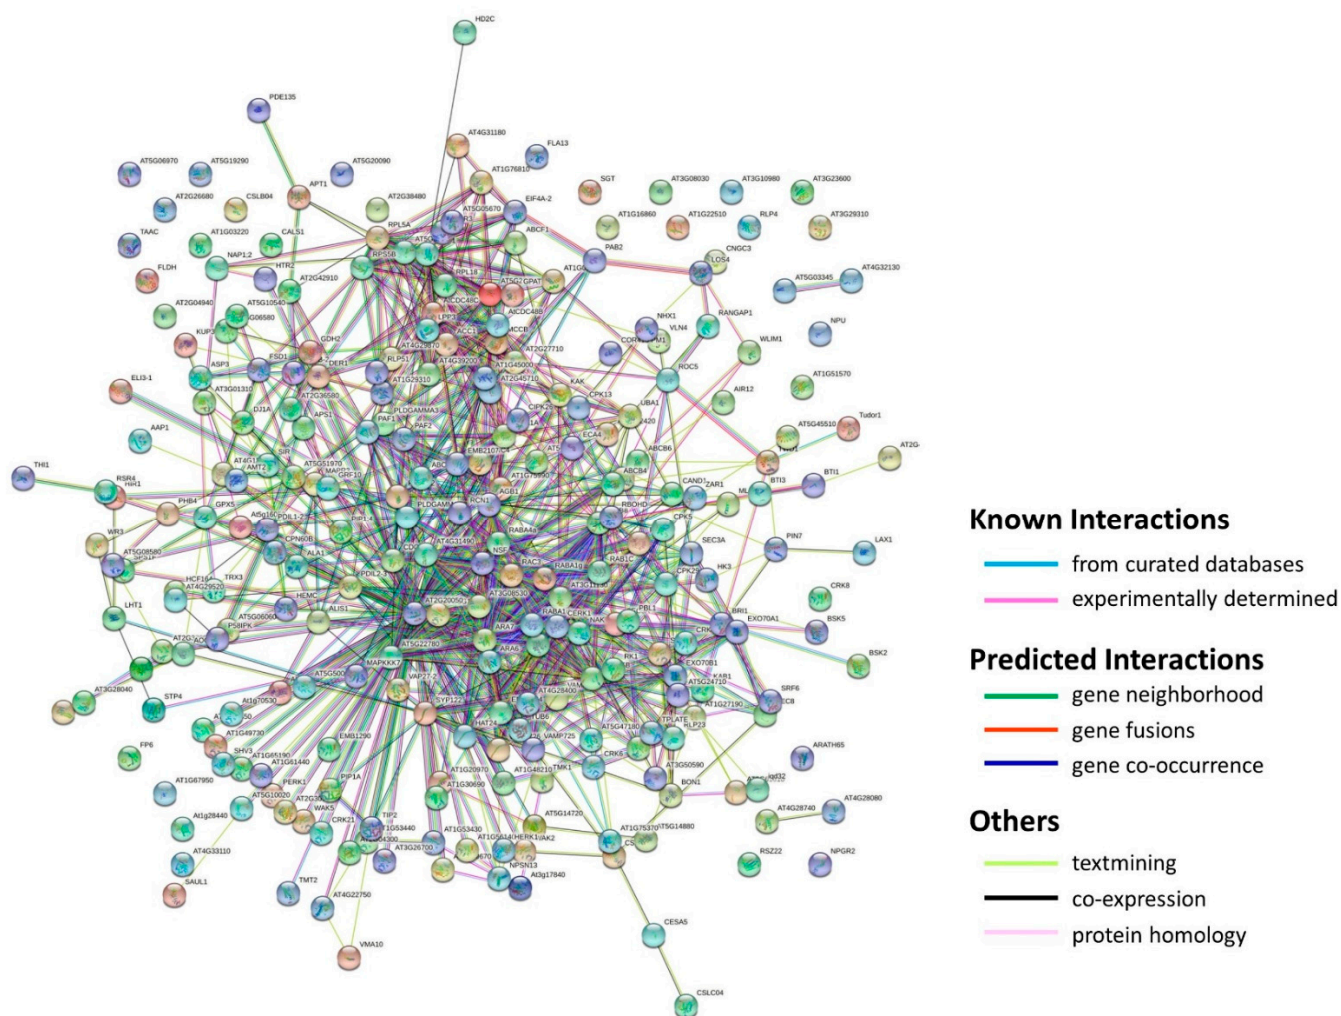

**Figure S8.** The protein-protein interaction networks of PM-associated proteins identified from LPS<sub>cc</sub>-treated Arabidopsis *bak1-4*. Circles: significant proteins; Straight lines: the interactions between different proteins; Colours: type of evidence for connection.

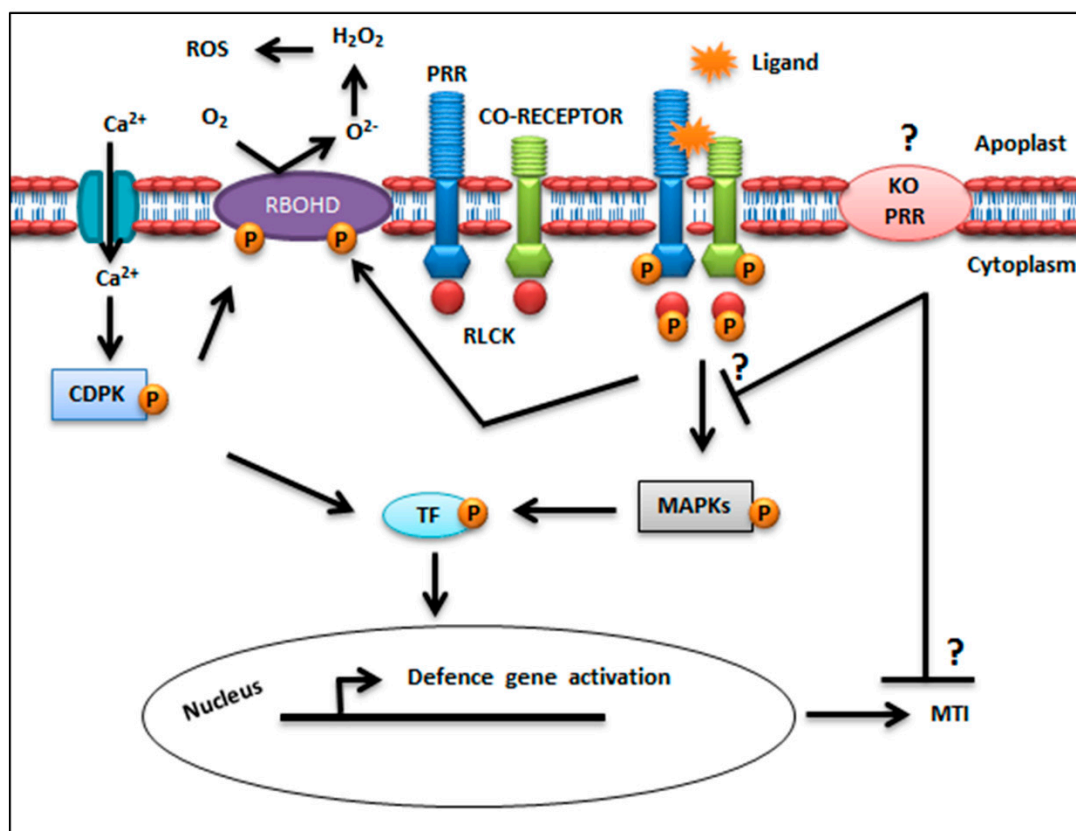

**Figure S9.** Generalised view of MAMP perception via PRRs, illustrating the potential impact of knockout (KO) effects that influence MAMP-triggered immunity. Upon MAMP (e.g., flg22) perception by a cognate PRR (e.g., in the case of FLS2 [39], the RLCK Botrytis induced kinase1 (BIK1) dissociates from its complex with FLS2 and co-receptor BAK1. This leads to the activation of defence responses such as ROS production, cytoplasmic Ca<sup>2+</sup> influx, activation of downstream signalling kinases (MAPK and CDPK) and upregulation of defence genes. KO of the PRR and/or co-receptor (demarcated by the dotted line) may impair activation of downstream defence signalling, that could possibly lead to increased susceptibility of a plant to a pathogen. P = Phosphorylation, RBOHD = Respiratory burst oxidase homolog D, TF = Transcription factor, PRR = Pattern recognition receptor, CR = Co-receptor, MAMP = Microbe-associated molecular pattern, ROS = Reactive oxygen species, CDPK = Calcium-dependent protein kinase, MAPK = Mitogen-activated protein kinase, RLCK = Receptor-like cytoplasmic kinase, MTI = MAMP-triggered immunity (taken from [2]).

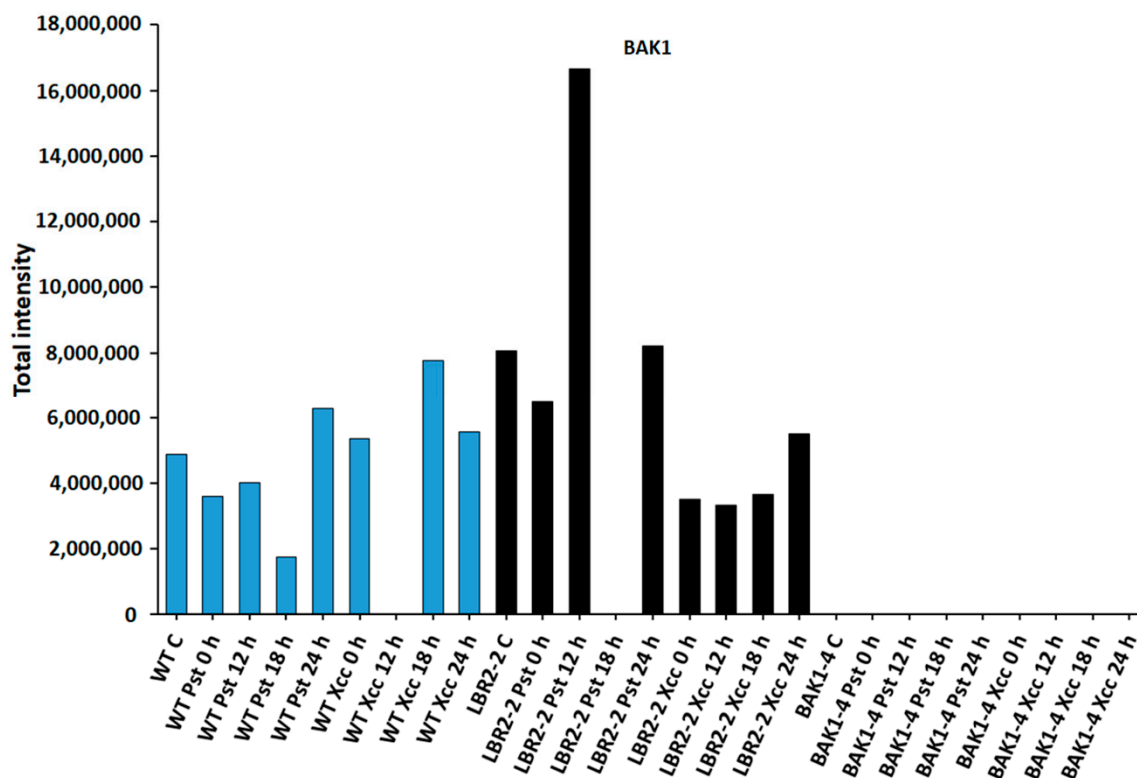

**Figure S10.** Analysis of total peak intensity of PM-associated BAK1 detected in the control, LPS<sub>Pst</sub> - and LPS<sub>Xcc</sub>-treated WT and *lbr2-2* within a 24 h period. Even though BAK1 was detected above the significance threshold scores in both LPS<sub>Pst</sub> and LPS<sub>Xcc</sub>-treated WT and *lbr2-2*, it was not included in the discussion due to detection within the significance threshold scores of the MgCl<sub>2</sub>-control at the 24 h period post-treatment.
